1 **NAD<sup>+</sup>-dependent deacetylase SIRT1 is essential for meiotic**  
2 **progression and controls repair-recombination efficiency**

3 Harshita Kaul<sup>1</sup>, Shaunak Deota<sup>1</sup>, Amit Fulzele<sup>2</sup>, Anne Gonzalez-de-Peredo<sup>2</sup>, Ullas  
4 Kolthur-Seetharam<sup>1,\*</sup>

- 5 1. Department of Biological Sciences, Tata Institute of Fundamental Research,  
6 Mumbai, Maharashtra, India.
- 7 2. Institut de Pharmacologie et de Biologie Structurale, Toulouse, France.

8  
9 \*Corresponding author

10 Email: [ullas@tifr.res.in](mailto:ullas@tifr.res.in)

11  
12 Short title: SIRT1 controls meiotic repair and recombination in mammals

13  
14 Keywords: Meiosis, Recombination, Synapsis, DNA damage response, (De)-  
15 acetylation, Crossover frequency, MRN

## 22 **Abstract**

23 Meiotic components and their functions have been extensively studied. Yet, the  
24 interplay between molecular factors and regulation of their functions that is brought  
25 about by post-translational modifications, specifically (de)-acetylation, is not well  
26 characterized. SIRT1, a NAD<sup>+</sup>-dependent deacetylase has been previously shown to  
27 be necessary for spermatogenesis. However, whether it has any role to play in  
28 mammalian meiosis remains to be uncovered. Our findings identify SIRT1 as a key  
29 determinant of meiotic progression. Knocking out SIRT1 specifically in meiocytes  
30 (*SIRT1<sup>Δmeio</sup>*) led to a delay in progression through pachytene and repair of double  
31 strand breaks. Interestingly, despite these deficits, meiotic loss of SIRT1 did not  
32 affect synapsis nor did it lead to pachytene arrest or apoptosis. Moreover, our results  
33 demonstrate that SIRT1 is required for regulating crossover frequency and its  
34 absence results in higher crossover events. Therefore, our study brings to the fore a  
35 novel regulatory factor/mechanism that is necessary for coupling of synapsis and  
36 recombination. This is noteworthy since mutations in core meiotic components result  
37 in gross defects in synapsis, repair and recombination, and very few studies have  
38 reported the differential regulation of these processes. Further, exposing *SIRT1<sup>Δmeio</sup>*  
39 to low/moderate doses of  $\gamma$ -irradiation indicated that SIRT1 might be involved in  
40 eliciting recombination checkpoint arrest and in its absence pachytene cells progress  
41 to diplotene stage, unlike in the *SIRT1<sup>WT</sup>* mice. Importantly, exogenous damage  
42 resulted in enhanced retention of  $\gamma$ H2AX in *SIRT1<sup>Δmeio</sup>* diplotene cells, reiterating the  
43 critical role that SIRT1 plays in regulating repair efficiency/kinetics. Molecularly, we  
44 find that SIRT1 interacts with MRN complex and lack of SIRT1 causes  
45 hyperacetylation of several non-histone proteins including the MRN components.  
46 Given that *SIRT1<sup>Δmeio</sup>* mice mimic MRN hypomorphs, we propose that SIRT1-

47 dependent deacetylation of these proteins is crucial for normal meiotic progression.

48 Taken together, our study uncovers a previously unappreciated role of SIRT1 in

49 meiotic progression.

50

## 51 **Author Summary**

52 Meiosis is a key process in germ cell development that is essential for generating

53 genetic diversity via recombination. It involves precise spatio-temporal orchestration

54 of various molecular events such as chromosomal synapsis, repair and

55 recombination. Whereas the core meiotic components are well known, upstream

56 factors that might be important for regulating their functions and also couple the

57 downstream processes are less explored. In this paper, we report that SIRT1, a

58 NAD<sup>+</sup>-dependent deacetylase, is necessary for meiotic progression by identifying its

59 role in coupling of synapsis and recombination. By generating a meiosis specific

60 knockout of SIRT1, we show that its absence in spermatocytes leads to

61 inefficient/delayed repair and progression through pachytene. We have also

62 uncovered that SIRT1 exerts control over recombination (cross over) frequency.

63 Interestingly, our findings demonstrate that SIRT1 provides protection against

64 exogenous genotoxic stress possibly by eliciting meiotic checkpoints. Thus, this

65 study provides both cellular and molecular insights into the importance of SIRT1

66 mediated protein deacetylation in governing meiosis in mammals.

## 67 Introduction

68 Spermatogenesis is a highly orchestrated process of germ cell development  
69 involving meiotic and post-meiotic events, which are intimately linked to genome and  
70 chromatin reorganization [1]. In addition, progression through these stages is  
71 intrinsically coupled to mechanisms that elicit checkpoints, in response to both  
72 endogenous and exogenous stresses such as DNA damage [2, 3]. Importantly,  
73 meiotic recombination entails programmed induction of double strand breaks  
74 (DSBs), whose repair and choice of resolution of the double Holliday junctions via  
75 either crossover or non-crossover events determines the recombination frequency  
76 and thus the final outcome of meiosis [3-6]. Although, chromatin and non-chromatin  
77 players that impinge on these processes are known, their regulation by post-  
78 translational modifications is poorly characterized [7-16]. Specifically, importance of  
79 de-/acetylation dependent control of meiosis has not been elucidated thus far.

80 Interestingly, previous reports including from our lab have demonstrated that  
81 SIRT1 (NAD<sup>+</sup>-dependent deacetylase) is abundantly expressed during  
82 spermatogenesis, more so in meiocytes [17, 18]. In addition, we have recently  
83 identified a shorter isoform, which lacks a domain that imparts substrate specificity  
84 and is predominantly expressed in the testis [18]. Not surprisingly therefore, various  
85 models of SIRT1 loss of function and testis-specific conditional mutants have been  
86 shown to cause sterility [17, 19-24]. While many of these reports have provided  
87 insights into the role of SIRT1 in post-meiotic maturation [17, 22], its relevance  
88 during meiosis has not been addressed. Although, knocking out *Sirt1* using *Stras8-*  
89 *Cre* led to abnormal spermatogenesis and reduced fecundity, any potential meiotic  
90 defects were poorly characterized [17]. Importantly, perturbing SIRT1 expression or  
91 function in testis resulted in loss of pachytene cells, indicating a plausible role for this

92 protein in orchestrating progression through meiosis [17, 20]. This is particularly  
93 relevant since SIRT1 expression is highest in meiotic prophase [17, 20] and it has  
94 been otherwise shown to be involved in DSB repair in somatic cells [25-31].  
95 Therefore, if/how SIRT1 affects spermatocytes at cellular and molecular levels  
96 remains unknown.

97        Seminal studies have identified key components of the meiotic machinery,  
98 which are essential for efficient DNA damage, repair and recombination. Mutating  
99 components such as SPO11, ATM, TRIP13, DMC1 and MLH1 leads to meiotic  
100 arrest, loss of meiocytes and therefore sterility [32-38]. Despite these, the molecular  
101 basis for functional interactions between many of these factors is less understood.  
102 For example, mice harboring hypomorphic alleles of the MRN complex are sub-fertile  
103 and have meiotic deficits without a change in meiotic population [39, 40], hinting at  
104 perturbations of certain molecular interactions/functions that result in such a  
105 phenotype. Further, recent reports employing combination mutants of molecular  
106 factors, which are essential for ensuring progression through meiotic stages, have  
107 provided interesting insights into possible regulatory loops and checkpoints exerted  
108 by them. Notably, perturbations involving MRN hypomorphs (*Mre11<sup>ALTD/ALTD</sup>* and  
109 *Nbs1<sup>ΔB/ΔB</sup>*) [39, 40] or *Atm<sup>-/-</sup>*; *Spo11<sup>+/-</sup>*; *Trip13<sup>mod/mod</sup>* [41-43] indicated that fine-tuning  
110 of activities of these proteins is critical in coupling different molecular processes such  
111 as synapsis, repair and recombination. These highlight the need for further studies  
112 that will not only unravel functional interactions between core meiotic components,  
113 but also of efforts to identify upstream regulators. Importantly, it is intuitive to expect  
114 that post-translational modification/s (PTM/s) based regulation would exert control  
115 over molecular-/temporal-coupling of these processes and hence define fidelity of  
116 meiosis.

117 In this study, we describe the key role that SIRT1 plays in regulating meiotic  
118 progression. Our findings demonstrate that loss of SIRT1 in meiocytes affects  
119 efficiency of repair and recombination, without causing an arrest in spermatogenesis.  
120 Notably, *Sirt1* <sup>$\Delta$ meio</sup> mice show a delay in repair and increased cross over frequencies.  
121 Exposing these mice to ionizing radiation also revealed that SIRT1 is necessary to  
122 elicit checkpoints in response to mild genotoxic stress. Together, this report identifies  
123 SIRT1, a NAD<sup>+</sup>-dependent deacetylase, as a critical meiotic regulator that is  
124 required to couple molecular processes with cellular progression through meiosis.

125

## 126 **Results**

### 127 **Meiotic loss of SIRT1 leads to hyper-acetylation of proteins**

128 Although, previous reports have alluded to a role of SIRT1 in meiosis during  
129 spermatogenesis, the precise function of this NAD<sup>+</sup>-dependent deacetylase during  
130 meiotic progression is still unknown. Thus, we set out to determine the phenotype of  
131 meiocyte-specific loss of SIRT1 by crossing *Sirt1 Exon-4*<sup>lox/lox</sup> mice with *Spo11-Cre*  
132 mice, henceforth called *Sirt1* <sup>$\Delta$ meio</sup>. (Figs 1A, 1B, S1A and S1B). To check for changes  
133 in acetylation of histone and non-histone proteins, we used both site specific and pan  
134 anti-acetyl antibodies. Consistent with earlier reports on the effect of loss of SIRT1 in  
135 mammals [44], we did not see global changes in histone acetylation (Figs 1C and 1D  
136 and S5 Fig), and it is most likely that levels of H3K9Ac and H4K16Ac (sites targeted  
137 by SIRT1) could be altered at specific loci. However, we found dramatic changes in  
138 acetylation of several non-histone proteins in testis (Figs 1E and 1F). These clearly  
139 show that loss of SIRT1 indeed leads to global hyper-acetylation of proteins in the  
140 germ cells.

141

142 **Meiotic populations and synapsis are unaffected in *Sirt1* <sup>$\Delta$ meio</sup> mice**

143 Unlike earlier reports of loss of SIRT1 either in the whole body or during pre-  
144 meiotic stages [17, 20, 24], we did not see any alterations in different cell  
145 populations, gross abnormalities in seminiferous tubule morphology or apoptotic  
146 cells in *Sirt1* <sup>$\Delta$ meio</sup> mice (S1C-S1E Figs). Further, on assessing the phenotype of mice  
147 reared at two separate animal facilities (AH-1 and AH-2, described in Methods), and  
148 as illustrated in the rest of the paper, the effect of loss of SIRT1 on meiotic  
149 progression was largely indistinguishable between these cohorts (S1C Fig).

150 Chromosome spreads from *Sirt1*<sup>WT</sup> and *Sirt1* <sup>$\Delta$ meio</sup> testis were stained for  
151 synaptonemal complex proteins SYCP3 and SYCP1, which mark the lateral and  
152 axial elements, respectively, to assess meiotic progression and synapsis. We found  
153 similar number of cells in leptotene, zygotene, pachytene and diplotene stages  
154 between *Sirt1*<sup>WT</sup> and *Sirt1* <sup>$\Delta$ meio</sup> mice, both in young adults and during first wave of  
155 spermatogenesis (Figs 2A-2D). Importantly, unlike the phenotypes observed earlier  
156 when *Sirt1* was knocked out in pre-meiotic stages [17, 22], we did not see any  
157 change in the relative percentage of pachytene cells. Further, we also found no  
158 abnormalities in terms of either desynapsis or breaks, both in autosomes and in sex  
159 chromosomes. SMC3 $\beta$  staining patterns were similar between *Sirt1*<sup>WT</sup> and *Sirt1* <sup>$\Delta$ meio</sup>  
160 mice (S2A Fig), indicating no difference in sister chromatid cohesion. In addition,  
161 scoring for H3K9Me3 and TRF1 did not indicate any centromeric or telomeric  
162 fusions, respectively (S1F and S1G Figs). However, it was interesting to see that  
163 *Sirt1* <sup>$\Delta$ meio</sup> meicytes exhibited a decrease in Synaptonemal Complex (SC) length,  
164 and a skew in the relative percentages of early and late pachytene cells (Figs 2E and

165 2F). Together, these indicated that despite having no gross defects on meiotic  
166 populations and synapsis between homologous chromosomes, loss of SIRT1 during  
167 meiosis resulted in delayed progression through pachytene.

168

### 169 **Absence of SIRT1 results in abnormal retention of $\gamma$ H2AX in pachytene stage**

170 Although, a lack of cellular phenotype was surprising, particularly since SIRT1  
171 is most abundant in meiotic cells, we scored for possible defects in double strand  
172 break (DSB) induction, repair and recombination efficiencies in *Sirt1* <sup>$\Delta$ meio</sup> mice. The  
173 process of meiosis begins with genome-wide programmed DSB formation,  
174 characterized by appearance of  $\gamma$ H2AX during leptotene and zygotene, and its  
175 clearance from autosomes is used as a readout for efficient repair [45]. Either  
176 abnormal levels or retention of  $\gamma$ H2AX, indicative of delayed or defective repair, is  
177 often associated with altered meiotic progression. In order to study the effect of loss  
178 of SIRT1 on induction or resolution of DSBs, we stained meiotic chromosome  
179 spreads for  $\gamma$ H2AX. As seen in Figs 3A and 3B,  $\gamma$ H2AX staining was similar at  
180 leptotene stage in both wild type and *Sirt1* <sup>$\Delta$ meio</sup> mice. Interestingly, while we saw an  
181 abnormal retention of  $\gamma$ H2AX in pachytene cells from *Sirt1* <sup>$\Delta$ meio</sup> mice as compared to  
182 *Sirt1*<sup>WT</sup>, it was cleared by diplotene (Figs 3A and 3B and S3A and S3B Figs).

183 To get a quantitative measure, we binned pachytene cells into three distinct  
184 categories vis-à-vis  $\gamma$ H2AX levels/pattern, as described by a previous report [46].  
185 Specifically, cells were scored as belonging to Stage-1, -2 or -3 based on whether  
186  $\gamma$ H2AX staining was cloud like, was in patches or was completely cleared from  
187 autosomes, respectively (Fig 3C). Notably, we found that *Sirt1* <sup>$\Delta$ meio</sup> germ cells were  
188 represented more in Stage-1 compared to *Sirt1*<sup>WT</sup> cells both at early- and mid-



189 pachytene, and in Stage-2 at late-pachytene (Fig 3D and S3C-S3E Figs). Moreover,  
190 mice housed at AH-1 and AH-2 phenocopied each other vis-à-vis abnormal retention  
191 of  $\gamma$ H2AX in *Sirt1<sup>Δmeio</sup>* mice (S3C-S3H Figs). We specifically highlight that  
192 independent of the underlying mechanism; abnormal retention of  $\gamma$ H2AX clearly  
193 indicated abrogated DSB homeostasis, which could have been caused by either  
194 increased DSB formation or a delay in repair in *Sirt1<sup>Δmeio</sup>* mice.

195

### 196 **Delayed repair kinetics in *Sirt1<sup>Δmeio</sup>* mice**

197 In order to determine whether the abnormal  $\gamma$ H2AX pattern was due to an  
198 increase in the number of DSBs or delayed repair, we assayed for homologous  
199 recombination repair markers like Replication Protein A (RPA32). The localization  
200 pattern and number of RPA foci on SC axis across meiotic stages are highly  
201 regulated and are used as *bona-fide* markers to assess repair kinetics/efficiency [47,  
202 48]. We observed that while the numbers of RPA foci on autosomes in the early  
203 pachytene stage were similar in *Sirt1<sup>WT</sup>* and *Sirt1<sup>Δmeio</sup>* cells (Figs 4A and 4B), foci  
204 counts at late pachytene were 3-fold higher in *Sirt1<sup>Δmeio</sup>* cells when compared to  
205 *Sirt1<sup>WT</sup>* (Figs 4C and 4D). Consistent with disappearance of  $\gamma$ H2AX, RPA foci were  
206 eventually cleared by diplotene. We also observed a similar pattern for pRPA foci in  
207 *Sirt1<sup>Δmeio</sup>* cells (S4 Fig). These results clearly indicate that while loss of SIRT1 did not  
208 have any effect on DSB induction, repair kinetics/efficiency was affected and  
209 importantly was decoupled with synapsis and progression through meiosis. The  
210 delay in repair may be due to delayed loading or reduced activity of downstream  
211 mediators of HR repair or a direct effect of deacetylation of  $\gamma$ H2AX itself. However,

212 based on our acetylation and SIRT1-interactome results (Fig 1E and Fig 6A), it is  
213 more likely to be caused by non-histone mediators of repair.

214

### 215 **SIRT1 affects crossover frequency**

216 Given that DSB repair kinetics/efficiency has been linked to crossover  
217 frequency [49, 50], we wanted to determine if meiotic SIRT1 loss had any impact on  
218 recombination. We assessed the crossover (CO) frequency using MutL Homolog 1  
219 (MLH1) as a marker and observed a significant increase in the average number of  
220 MLH1 foci in *Sirt1<sup>Δmeio</sup>* compared to *Sirt1<sup>WT</sup>* (Figs 5A and 5B). There was an increase  
221 in the number of bivalents with two and three MLH1 foci (Figs 5D and 5E). We also  
222 saw a high percentage of cells with one MLH1 focus on sex body in *Sirt1<sup>Δmeio</sup>*  
223 compared to *Sirt1<sup>WT</sup>* mice (Fig 5C). Additionally, we did not observe any achiasmate  
224 cells in metaphase spreads from *Sirt1<sup>Δmeio</sup>* mice (S2B Fig). Thus, our results  
225 indicated that SIRT1 impinges on meiotic cross over frequency, which was hitherto  
226 unknown.

227

### 228 **SIRT1 is associated with the MRN complex in testis**

229 The results presented above clearly illustrated inefficient repair/recombination  
230 in the absence of SIRT1 functions in spermatocytes. To gain preliminary mechanistic  
231 insights, we used proteomics to map SIRT1-interactome in the testis, specifically to  
232 look for factors that could explain the phenotype of *Sirt1<sup>Δmeio</sup>* mice. Interestingly, we  
233 found that SIRT1 was associated with the MRN complex in the testis (Figs 6A-6C).  
234 Although, SIRT1 has been implicated in regulating MRN complex via NBS1 in  
235 somatic cells [28, 51], whether it interacts with and deacetylates other components in

236 the complex, and more so during meiosis, has not been investigated until now. We  
237 also found MRE11 to be hyperacetylated following SIRT1 inhibition in HEK293T cells  
238 (S5 Fig). Even though the data presented in S5 Fig was obtained from heterologous  
239 cell line, it nevertheless shows for the first time that MRE11 acetylation is SIRT1-  
240 dependent. Further, earlier reports have also indicated that RAD50 acetylation is  
241 increased upon SIRT1 loss of function [52, 53]. In this regard, our findings on  
242 MRE11 hyperacetylation are significant and together suggest that SIRT1 potentially  
243 regulates all the components of the MRN complex. Moreover, analysis of SIRT1  
244 interacting proteins from testis using Gene Ontology (GO) functional analyses and  
245 STRING database showed that other key regulators of repair/recombination, which  
246 are associated with MRN complex, could be involved in a functional network (Figs  
247 6A-6C). Even though we could immunoprecipitate MRN components from human  
248 cells, our efforts to check hyperacetylation of immunoprecipitated MRE11 and  
249 RAD50 from spermatocytes of *Sirt1<sup>Δmeio</sup>* mice failed, possibly due to inefficient pull-  
250 down or relative lower abundance of endogenous proteins in mice testis (Data not  
251 shown). Although speculative, the hyperacetylated bands in *Sirt1<sup>Δmeio</sup>* testis  
252 correspond to the molecular weights of MRE11, NBS1 and RAD50 (Fig 1F). It should  
253 also be noted that the phenotype we have described here mimics that reported in  
254 *Mre11<sup>ALTD/ALTD</sup>* and *Nbs1<sup>ΔB/ΔB</sup>* hypomorphs to a large extent [39]. Thus, in the future  
255 it will be exciting to tease out the contributions of each of these SIRT1-dependent  
256 de-/acetylations in regulating interactions and/or activities of MRE11, RAD50 and  
257 NBS1 (Fig 6D) using acetyl-/deacetyl-mimic mutant versions of these proteins  
258 specifically expressed during meiosis.

259

260 ***Sirt1<sup>Δmeio</sup>* mice are hypersensitive to low exogenous DNA damage**

261 *Sirt1<sup>Δmeio</sup>* mice showed delayed repair and progression through pachytene  
262 without any effects on synapsis or distributions of meiotic populations. This prompted  
263 us to investigate if an absence of SIRT1 would result in hyper-sensitization to  
264 low/moderate levels of genotoxic stress. In particular, we wanted to address if SIRT1  
265 had any role to play in eliciting meiotic checkpoints in response to exogenous DNA  
266 damage.

267 Previous reports have indicated that irradiation (IR) of C57BL/6 mice with  
268 doses below 8Gy does not lead to any apparent apoptosis of germ cells or reduction  
269 in sperm counts, and spermatogenesis proceeds uninterrupted [54]. It is interesting  
270 to note that across multiple doses of IR, we saw an increased global accumulation of  
271  $\gamma$ H2AX. Specifically, irradiation with a moderate dose of 3Gy showed that the  
272 percentage of cells displaying pattern characterized as stage-1 was significantly  
273 higher in *Sirt1<sup>Δmeio</sup>* cells (Fig 7B and S6A-S6C Figs). Moreover, the severity of the  
274 phenotype vis-à-vis retention of  $\gamma$ H2AX was directly correlated to the extent of  
275 exogenous damage and was significantly more than what was observed in  
276 undamaged *Sirt1<sup>Δmeio</sup>* mice (Fig 7B and S6A-S6F Figs).

277 It is known that loss of repair/recombination factors lead to checkpoint bypass  
278 during meiosis [42, 43, 55]. Based on the results presented above, we were tempted  
279 to examine if SIRT1 was essential to induce such quality control mechanisms,  
280 specifically in response to exogenous damage. We saw a dose-dependent increase  
281 in the ratios of diplotene to pachytene cells in *Sirt1<sup>Δmeio</sup>* mice compared to *Sirt1<sup>WT</sup>*  
282 (Fig 7C). Our results suggest that upon induced damage, unlike in the wild type, loss  
283 of SIRT1 may lead to bypass of the pachytene/recombination checkpoints.  
284 Interestingly, compared to non-irradiated cells, irradiated diplotene cells showed

285 patches of  $\gamma$ H2AX and the number of these patches was significantly higher in  
286 *Sirt1<sup>Δmeio</sup>* cells compared to *Sirt1<sup>WT</sup>* (Fig 7D and 7E). Together, these indicated  
287 persistence of damage even in diplotene and further corroborated our earlier findings  
288 on the role for SIRT1 in activating and/or coupling molecular factors involved in  
289 repair and recombination. Hence, we propose that in response to exogenous  
290 damage, SIRT1 is required for eliciting checkpoint mechanisms, which needs to be  
291 addressed in the future.

292

## 293 **Discussion**

294 In this study, we report the importance of a NAD<sup>+</sup>-dependent deacetylase  
295 SIRT1 in regulating meiotic progression. Our findings reveal that SIRT1 is required to  
296 couple synapsis and meiotic DSB repair/recombination, and its absence leads to  
297 defective DSB repair and altered recombination frequency. Besides being one of the  
298 first reports to highlight the role of SIRT1 in meiotic progression, our study posits that  
299 de-/acetylation of molecular factors that govern these processes is necessary to elicit  
300 checkpoints under both basal and induced DNA damage conditions.

301 Loss-of-function mutants of SIRT1 in testis have indicated that it is  
302 indispensable for spermatogenesis [17, 19-22, 24]. Absence of SIRT1 has been  
303 shown to induce apoptosis and loss of meiotic populations, for example when *Sirt1*  
304 was knocked out using the pre-meiotic *Stra8-Cre* [17]. While, recent reports have  
305 provided some insights into its role in post-meiotic phases [17, 22], its importance in  
306 meiotic progression (specifically given its high expression in spermatocytes) remains  
307 to be unraveled. Our study, which has employed *Spo11-Cre* to knockout *Sirt1* only in  
308 spermatocytes, clearly shows that it plays a key role in meiotic progression. Given

309 that the meiosis specific knockout of *Sirt1* does not lead to any loss of cells, it is  
310 likely that the phenotypes observed in the previous reports [17, 20, 24] reflect a  
311 cumulative effect of absence of SIRT1 in pre-meiotic and meiotic stages. Importantly,  
312 since lack of SIRT1 during meiosis did not lead to gross perturbations in meiotic  
313 populations, this model enabled us to unravel its role in regulating core meiotic  
314 processes viz. repair and recombination.

315 It is intuitive to expect that coupling of molecular processes to cellular  
316 progression through meiosis would possibly be regulated by post-translational  
317 modifications of both core and regulatory components. For example, phosphorylation  
318 is known to orchestrate meiotic progression, including by impinging upon DSB  
319 induction/repair efficiency and crossover frequency [56]. Even though acetylation is  
320 now regarded as a predominant modification on several proteins [57-59], if/how de-  
321 /acetylation of repair/recombination machinery affects meiotic progression is poorly  
322 addressed. In this context, our study clearly illustrates that absence of SIRT1 causes  
323 global hyper-acetylation of specifically non-histone proteins, and brings to the  
324 forefront the need to further investigate the interplay between protein de-/acetylation  
325 and meiosis in mammals. Our study also paves way for future efforts to investigate  
326 the possible links between metabolic inputs and meiosis given that SIRT1 is a NAD<sup>+</sup>-  
327 dependent deacetylase.

328 One of the key highlights of our study is loss of coupling between synapsis  
329 and repair/recombination in *Sirt1*<sup>Δmeio</sup> mice (Fig 6D). Given the tight interplay  
330 between synapsis and recombination, and the fact that loss of meiotic components  
331 also cause synapsis defects [39, 42], the current understanding of recombination-  
332 mediated control of progression through meiosis is limited [38, 39, 42, 43, 60].  
333 Studies using individual or combination mutants involving *Mre11*<sup>ALTD/ALTD</sup>, *Nbs1*<sup>ΔB/ΔB</sup>,

334 *Atm*<sup>-/-</sup>; *Spo11*<sup>+/-</sup>, *Trip13*<sup>mod/mod</sup>, *p53*<sup>-/-</sup> and *Chk2*<sup>-/-</sup> have provided insights into  
335 regulation of both synapsis and recombination check points, which together control  
336 progression through meiosis [42, 43]. In this regard, our results not only establish  
337 SIRT1 as a key driver of meiotic progression but also as an upstream regulator of  
338 meiotic checkpoints.

339 Specifically, loss of SIRT1 led to delayed repair as indicated by high  $\gamma$ H2AX in  
340 early-mid pachytene, which was further corroborated by abnormal retention of RPA  
341 in late pachytene. Notably, the numbers of RPA foci at early pachytene were  
342 comparable between *Sirt1*<sup>WT</sup> and *Sirt1* <sup>$\Delta$ meio</sup>, indicating that the phenotype was  
343 unlikely to be caused by excess DSBs. Additionally, shorter SC-axis length at late  
344 pachytene in *Sirt1* <sup>$\Delta$ meio</sup> mice indicated delayed progression through meiosis [60].  
345 Moreover, the pivotal role played by SIRT1 in exerting control over DSB repair was  
346 evident from the phenotype of *Sirt1* <sup>$\Delta$ meio</sup> mice exposed to irradiation induced  
347 exogenous damage. *Sirt1* <sup>$\Delta$ meio</sup> spermatocytes had exaggerated retention of  $\gamma$ H2AX  
348 when compared to the control, symptomatic of deficient repair. Intriguingly, however,  
349 at 3Gy and 6Gy of irradiation, loss of SIRT1 led to bypass of pachytene-to-diplotene  
350 checkpoint, albeit with persistent damage as indicated by increased number of  
351 diplotene  $\gamma$ H2AX patches in *Sirt1* <sup>$\Delta$ meio</sup> mice compared to *Sirt1*<sup>WT</sup>. Therefore, our  
352 results together uncover a dual role of SIRT1 in not only coupling synapsis to  
353 repair/recombination, but also in activation of checkpoints following exogenously  
354 induced damage (Fig. 6D).

355 It was also exciting to find that meiotic loss of SIRT1 led to a significant  
356 increase in crossover frequency as indicated by enhanced number of MLH1 foci.  
357 This is consistent with previous reports wherein increased DSBs and/or defective

358 repair have been associated with altered recombination frequency [49, 50].  
359 Together, these are significant findings since PTM based mechanisms that elicit  
360 recombination and repair checkpoints are less understood. In this regard, we  
361 propose that SIRT1-dependent deacetylation might be involved in setting a threshold  
362 for activation of either of these checkpoints, under both basal and exogenously  
363 induced damage conditions. In the future, it will be exciting to not only investigate the  
364 interplay between SIRT1 and pathways that induce these checkpoints but also in  
365 general to address the relevance of de-/acetylation-mediated control of meiotic  
366 progression.

367 Our efforts to gain preliminary insights into possible SIRT1-dependent  
368 molecular mechanisms during meiosis revealed components of the MRN complex  
369 (Fig 6B). Although, SIRT1-NBS1 interaction is known [28, 51], our results clearly  
370 illustrate that SIRT1 interacts with and affects acetylation of other components of  
371 MRN complex as well. In this context, we would like to highlight that *Sirt1* <sup>$\Delta$ meio</sup> mice  
372 phenocopy *Mre11* and *Nbs1* hypomorphic mutants [39], and together with the  
373 molecular data, it clearly suggests that SIRT1-MRN interplay is critical for meiotic  
374 progression. In the future, it will be interesting to investigate the role of de-  
375 /acetylation in controlling activity/localization of MRN complex during meiosis. It is  
376 also likely that SIRT1 could exert control over other key players such as ATM, p53,  
377 CHK2 and TRIP13 to mediate a tight coupling of synapsis, repair and recombination.

378 In summary, we have discovered a novel function of SIRT1 in meiosis. Our  
379 findings further highlight the importance of identifying mechanisms that affect or  
380 regulate core meiotic components. Specifically, given that mutation of some of these  
381 core-components lead to meiotic arrest, our results demonstrate that regulatory post-  
382 translational modifications, as brought about by SIRT1 in this case, are key



383 determinants of meiotic outcome both in terms of governing quality of germs cells  
384 and recombination frequency.

385

## 386 **Materials and methods**

387 **Ethics statement:** The procedures and the project were approved and were in  
388 accordance with the Institute Animal Ethics Committee (IAEC) guidelines.

389 **Housing, AH1 and AH2:** Mice housed in two different animal facilities at ACTREC-  
390 Mumbai (AH1) and IISER-Pune (AH2) were used in this study. While this was done  
391 due to shifting of our mice colony, it provided us the opportunity to score for the  
392 robustness of the phenotype when mice were reared in different housing conditions.  
393 The molecular/cellular phenotypes described in this manuscript were consistent  
394 between AH1 and AH2, and results specifically obtained from either of the facilities  
395 have been clearly indicated.

396 **Mutant mice:** All animals were maintained on 12-hour light/dark cycle and given *ad-*  
397 *libitum* access to standard chow diet. Pups were weaned from mothers at 25 d.p.p.  
398 and group-housed later. *Sirt1-Exon4<sup>lox/lox</sup>* mice were obtained from Jackson  
399 laboratories (Jax-mice-ID 008041) and *Spo11-Cre* mice were a kind gift from Prof.  
400 Paula Cohen, Cornell University, Ithaca, USA. *Sirt1-Exon4<sup>lox/lox</sup>* strain was isogenized  
401 to C57BL/6N background for ten generations. Testis specific knockouts of *Sirt1* were  
402 generated using the strategy as shown in Fig 1A.

403 **Mice genotyping:** For determining the genotype of the mice, tail clips or  
404 seminiferous tubules were digested and PCR was performed using KAPA HotStart  
405 Mouse Genotyping Kit (KAPA BIOSYSTEMS, Cat No. KK7352). The following primer  
406 pairs were used for determining genotype- *Sirt1* genotyping: FP: 5'-

407 GGTTGACTTAGGTCTTGTCTG-3', RP: 5'-CGTCCCTTGTAATGTTTCCC-3',  
408 Spo11-Cre genotyping: FP: 5'-TGGGCGGCATGGTGCAAGTT-3', RP: 5'-  
409 CCGTGCTAACCAGCGTTTTTC-3', Post Cre excision Sirt1 Genotyping: FP: 5'-  
410 AGGCGGATTTCTGAGTTCGA-3', RP: 5'-CGTCCCTTGTAATGTTTCCC-3'.

411 **Meiotic chromosome spreads:** Meiotic chromosome spreads were prepared as  
412 described earlier [61]. Briefly, testes were harvested and collected in PBS,  
413 decapsulated and tubules detangled. Short segments of the tubules were placed in  
414 hypotonic lysis solution (30mM Tris pH 8.2, 50mM Sucrose, 17mM citrate trisodium  
415 dihydrate, 5mM EDTA, 0.5mM DTT and 0.1mM PMSF) for 90 minutes. Tubule  
416 segments were then transferred to 100mM sucrose solution, pH 8.2 and were finely  
417 diced/chopped using forceps. These were spread onto slides previously dipped in  
418 1% paraformaldehyde with 0.15% Triton X-100 and were dried overnight in a  
419 humidified chamber at 37°C. Slides were then washed twice in 1X PBS and  
420 Photoflo™ and fresh spreads were used to score for chromosome synapsis to avoid  
421 breaks during freeze-thaw.

422 **Metaphase chromosome spreads:** Testes were decapsulated in PBS and  
423 detangled using forceps. Single cell suspension of testicular cells was obtained by  
424 treating seminiferous tubules in 0.5 mg/ml Collagenase A (Roche, Catalog No:  
425 23324223) for 45 minutes at room temperature. Debris was removed by passing this  
426 through two layers of gauze. Cells were washed twice with 2.2% sodium citrate  
427 (isotonic) buffer, and the final cell pellet was resuspended and incubated in 0.9%  
428 sodium citrate (hypotonic) solution at 37°C for 20 minutes. The cells were fixed in  
429 Carnoy's Fixative (methanol:acetic acid :: 3:1) and were then dropped onto pre-  
430 warmed (60°C) slides and allowed to spread. DAPI was used to stain the DNA.

431 **Antibodies:** The following primary antibodies were used as indicated in the figures:  
432 anti-SCP3 (Abcam, ab15093 and ab97672), anti-SCP1 (Abcam, ab15087), anti-  
433  $\gamma$ H2AX (CST, 9718), anti-RPA (Abcam, ab109394), anti-pRPA (Abcam, ab76420),  
434 anti-Mre11 (Merck, MABE 1153), anti-MLH1 (Santa Cruz, 550838), anti-TRF1  
435 (Abcam, ab-1423-100), anti-SIRT1 (Merck, 07-131), anti-pan acetyl (CST, 9814S),  
436 anti-H3K9Ac (Diagenode, C15410004), anti-H4K16Ac (CST, E2B8W), anti-H3 (CST,  
437 CS-135-100) and anti-H4 (Abcam, ab7311). The following secondary antibodies for  
438 either immunofluorescence or immunoblot analyses: Goat anti-Rabbit IgG (H+L)  
439 Secondary Antibody, Alexa Fluor 488 (Invitrogen, A-11034), Goat anti-Mouse IgG  
440 (H+L) Secondary Antibody, Alexa Fluor 488 (Invitrogen, A-11001), Goat anti-Rabbit  
441 IgG (H+L) Secondary Antibody, Alexa Fluor 594 (Invitrogen, A-11012), Goat  
442 anti-Mouse IgG (H+L) Secondary Antibody, Alexa Fluor 594 (Invitrogen, A-11005),  
443 Anti Mouse IgG peroxidase antibody (Sigma, A4416), Anti Rabbit IgG peroxidase  
444 antibody (SIGMA, A0545) and Anti ArHm IgG peroxidase antibody (Abcam, ab5745)

445 **Immunofluorescence:** Immunofluorescence was performed using previously  
446 described methods [42, 61]. Briefly, slides were washed in PBS + Photoflo™ and  
447 PBS + Triton X-100, blocked for 30 minutes and incubated overnight with indicated  
448 primary antibody at 4°C or with secondary antibodies for 45 minutes, and counter  
449 stained with DAPI. Spreads were washed after incubations with antibodies as  
450 described (36). The spreads were then imaged using Apotome epifluorescence  
451 microscope (Zeiss) and images analysed using Image J (Fiji). For quantification of  
452 RPA, pRPA and MLH1, only those foci that colocalized with SYCP3 axis were  
453 considered.

454 **Protein lysate preparation and immunoblot analyses:** Protein lysates were  
455 prepared by homogenizing cells/tissues, and incubating on ice for 20 minutes, in

456 either Radioimmunoprecipitation assay (RIPA) buffer (50mM Tris chloride, pH 8.0;  
457 150mM Sodium chloride; 0.1% SDS; 0.5% sodium deoxycholate; 1% Triton X-100;  
458 1mM sucrose) or TNN buffer (50mM Tris pH7.5, 150mM NaCl and 0.9% NP-40).  
459 Commercially available protease inhibitors PIC (Roche, Catalog No: 04693159001)  
460 and PMSF (Roche, Catalog No: 000000010837091001) and phosphatase inhibitors  
461 PhoStop (Roche, Catalog No. 04906837001) were added to buffer immediately  
462 before use. The cell debris was removed by centrifugation at 12,000xg for 15  
463 minutes at 4°C and the protein concentration in the supernatant was determined by  
464 BCA assay. RIPA lysates were used for immunoblot analyses and TNN lysates were  
465 used for immunoprecipitation or immunoblot analyses. Immunoblots were developed  
466 using Chemiluminescence detection kit (ThermoFischer Scientific, Catalog No.  
467 P134080) and visualized using GE Amersham Imager 600. Band intensities were  
468 quantified using ImageJ.

469 **Histone Extraction from testis tubules:** For extraction of histones from testis  
470 tubules, the protocol was followed as described earlier [62]. Briefly, tubules were  
471 homogenized in TNN buffer, followed by treatment of the pellet with 4N H<sub>2</sub>SO<sub>4</sub> at  
472 37°C. Histones were precipitated using Trichloroacetic acid (TCA), followed by  
473 washes with acetone. The pellet was finally resuspended in water and boiled in  
474 Laemmli buffer.

475 **Histological analyses of testis sections:** Testis fixed in Bouin's solution (Sigma,  
476 Catalog No. HT10132) were processed for obtaining paraffin embedded sections as  
477 per standard procedures. 5µm thick sections were used for staining. For Hematoxylin  
478 and eosin staining sections were deparaffinized and rehydrated before staining with  
479 Gill's hematoxylin (Sigma, Catalog No. S076) and Eosin (Sigma, Catalog No. S007),

480 as per standard procedures. Slides were finally treated with 95% ethanol, 100%  
481 ethanol and xylene and mounted in DPX.

482 **TUNEL assay:** TUNEL assay for scoring apoptotic cells was performed using *In situ*  
483 cell death detection kit fluorescein (Roche, Catalog No.11684795910), as per  
484 manufacturer's protocol.

485 **Gamma irradiation:** 3-month old mice (*Sirt1<sup>Δmeio</sup>* or *Sirt1<sup>WT</sup>*) were subjected to  
486 different non-lethal doses of Gamma Irradiation using Cobalt-60 source, as  
487 indicated. Immediately after the irradiation the mice were administered water with  
488 antibiotic (Meriquin- Enrofloxacin oral solution, 0.1% in autoclaved water) and were  
489 sacrificed after 72 hours for further analyses.

490 **Flow cytometry analysis:** Single cell suspensions were obtained by Collagenase-A  
491 treatments as described earlier and were fixed in 70% ethanol at -20°C overnight.  
492 Following treatment with 300μg/ml RNase-A (Roche) they were stained with 25μg/ml  
493 propidium iodide (Sigma) and the populations of n, 2n, 4n were scored using FACS  
494 Fortessa (BD Biosciences) and analyzed using BD FACSDIVA 6.0 software.

495 **Cell culture and treatment with SIRT1 inhibitor:** HEK293T cells were maintained  
496 in DMEM High glucose medium (Sigma, Cat No. D777) supplemented with 10% FBS  
497 and antibiotic-antimycotic, under standard conditions. They were treated with either  
498 EX527 (working conc. 10μM), inhibitor of SIRT1 or 0.1% DMSO for 16 hours. Cell  
499 pellets were used to obtain TNN lysates for immunoprecipitation or immunoblot  
500 analyses.

501 **Immunoprecipitation and interaction analyses:** TNN lysates from cells/tissues  
502 were incubated overnight at 4°C with indicated antibodies and normal IgG was used  
503 as a control, and as described earlier [18]. Immune complexes were pulled down

504 with Protein-G/Protein-A beads, as appropriate. For identifying SIRT1 interactors in  
505 testis endogenous SIRT1 was immunoprecipitated from six testes (three C57/BL6  
506 mice). The complexes, eluted in 2X Laemmli buffer, were run on 12% SDS-PAGE  
507 through the stacking gel and the run was stopped once they reached the resolving  
508 gel. The gels were stained with Coomassie blue dye and the stained gel plugs were  
509 cut and washed with water/acetonitrile (50/50), reduced, alkylated and trypsin  
510 digested and processed for mass spectrometry analysis.

511 The extracted peptides were run on nanoLC-MS/MS with an UltiMate 3000  
512 RSLCnano system (Dionex) coupled to an Orbitrap-Velos mass spectrometer  
513 (Thermo Scientific). Five microliters of each sample were loaded on a C-18  
514 precolumn (300  $\mu$ m inner diameter  $\times$  5 mm; Dionex) in a solvent made of 5 %  
515 acetonitrile and 0.05 % trifluoroacetic acid, at a flow rate of 20  $\mu$ l/min. After 5 min of  
516 desalting, the precolumn was switched online with the analytical C-18 column (75  $\mu$ m  
517 inner diameter  $\times$  50 cm; Reprosil C18) equilibrated in 95% solvent A (5 %  
518 acetonitrile, 0.2 % formic acid) and 5 % solvent B (80 % acetonitrile, 0.2 % formic  
519 acid). Peptides were eluted using a gradient of solvent B from 5 to 25 % in 80 min,  
520 then 25 to 50% in 30min, and 50 to 100% in 10min, at a flow rate of 300 nl/min. The  
521 mass spectrometer was operated in a data-dependent acquisition mode with  
522 Xcalibur software. Survey MS scans were acquired in the Orbitrap on the 350–1800  
523 m/z range with the resolution set at 60,000 and AGC target at  $1 \times 10^6$  ions, the 20  
524 most intense ions were selected for CID (collision-induced dissociation), and MS/MS  
525 spectra were acquired in the linear trap with an AGC target at  $5 \times 10^3$  ions,  
526 maximum fill time at 100 ms, and a dynamic exclusion of 60 s to prevent repetitive  
527 selection of the same peptide. Triplicate technical LC-MS measurements were  
528 performed for each sample. The mass spectrometry proteomics data have been

529 deposited to the ProteomeXchange Consortium via the PRIDE [63] partner  
530 repository with the dataset identifier PXD014075.

531 Raw MS files were processed with MaxQuant software (version 1.5.2.8) for  
532 database search with the Andromeda search engine and quantitative analysis, as  
533 described earlier [64] Data were searched against Mus musculus entries in the  
534 Swissprot protein database (release UniProtKB/Swiss-Prot 2017-01). Protein  
535 quantification was performed using the LFQ intensity metrics from the MaxQuant  
536 “protein group.txt” output, to compare proteins identified in SIRT1-immunopurified  
537 and control samples. An average intensity value was calculated for each protein from  
538 the intensity values of the 3 MS technical replicate runs. Intensities were log2-  
539 transformed, and imputation of missing value with noise was performed in the  
540 Perseus software.

541 To assess interactors that belonged to particular cellular processes,  
542 proteins/peptides specifically enriched in SIRT1-immunoprecipitates were analyzed  
543 using GO analyses tool (<https://david.ncifcrf.gov/>) and STRING database  
544 (<https://string-db.org/>).

545 **Statistical test analysis:** All analysis was performed using GraphPad Prism 6.0 or  
546 Microsoft Excel. Statistical significance was determined using Student’s t-test  
547 (between groups) or Mann-Whitney-U test (for MLH1 foci and SC length  
548 quantifications). For LC-MS/MS data, statistical analysis was performed in Perseus  
549 by applying a Student t-test between SIRT1 and control groups, and a global  
550 permutation-based FDR of 5% to detect proteins significantly enriched in SIRT1-  
551 immunopurified samples. P-values <0.05, <0.01 and <0.001 are indicated by \*, \*\*  
552 and \*\*\* respectively for all experiments.

553 **Acknowledgements:**

554 We acknowledge the following funding sources: IFCPAR (Indo French Centre for the  
555 Promotion of Advanced Research) 4503-1, Swarnajayanti fellowship (DST Govt. of  
556 India. Grant number DST/SJF/LSA-02/2012-13) and TIFR-DAE (Govt. of India. Grant  
557 number 12P0122). We thank Paula Cohen, Cornell University, USA for sharing the  
558 Spo11-Cre mouse with us. We thank Gauri Shembekar for help with MLH1 and SC  
559 length quantifications. We acknowledge Investissement d'Avenir program ProFI  
560 (Proteomics French Infrastructure, ANR-10-INBS-08) for providing assistance with  
561 mass spectrometry. We thank NCCS-Pune, Dr. Boppana Ramanamurthy and Mr.  
562 Suresh Basutkar for help with gamma-irradiation. Animal house staffs at TIFR-  
563 Mumbai, National Facility for Gene Function in Health and Disease (NFGFHD) at  
564 IISER-Pune and ACTREC are acknowledged for help with animal experimentation  
565 and ACTREC histology department for help with testis sectioning. We also thank Dr.  
566 Kalidas Kohale, Dr. Shital Suryavanshi, Dr. Sachin Atole, Dr. Sagar Tarate, and Ms.  
567 Ritika Gupta for the help with animal experiments.

568

569 **Author contributions:**

570 Project conceptualization, funding acquisition and Supervision: UKS. Investigation  
571 and analyses: HK, SD, AF, AGP, UKS. Manuscript writing and data formatting: HK,  
572 SD, UKS.

573

574

575



## 576 **References**

- 577 1. Cheng CY, Mruk DD. The biology of spermatogenesis: the past, present and future. *Philos*  
578 *Trans R Soc Lond B Biol Sci.* 2010;365(1546):1459-63. Epub 2010/04/21. doi:  
579 10.1098/rstb.2010.0024. PubMed PMID: 20403863; PubMed Central PMCID: PMCPMC2871927.
- 580 2. Jan SZ, Hamer G, Repping S, de Rooij DG, van Pelt AM, Vormer TL. Molecular control of  
581 rodent spermatogenesis. *Biochim Biophys Acta.* 2012;1822(12):1838-50. Epub 2012/03/01. doi:  
582 10.1016/j.bbadis.2012.02.008. PubMed PMID: 22366765.
- 583 3. Baudat F, Imai Y, de Massy B. Meiotic recombination in mammals: localization and  
584 regulation. *Nat Rev Genet.* 2013;14(11):794-806. Epub 2013/10/19. doi: 10.1038/nrg3573. PubMed  
585 PMID: 24136506.
- 586 4. Cohen PE, Pollard JW. Regulation of meiotic recombination and prophase I progression in  
587 mammals. *Bioessays.* 2001;23(11):996-1009. Epub 2001/12/18. doi: 10.1002/bies.1145. PubMed  
588 PMID: 11746216.
- 589 5. Gray S, Cohen PE. Control of Meiotic Crossovers: From Double-Strand Break Formation to  
590 Designation. *Annu Rev Genet.* 2016;50:175-210. Epub 2016/09/21. doi: 10.1146/annurev-genet-  
591 120215-035111. PubMed PMID: 27648641; PubMed Central PMCID: PMCPMC5319444.
- 592 6. Cole F, Kauppi L, Lange J, Roig I, Wang R, Keeney S, et al. Homeostatic control of  
593 recombination is implemented progressively in mouse meiosis. *Nat Cell Biol.* 2012;14(4):424-30.  
594 Epub 2012/03/04. doi: 10.1038/ncb2451. PubMed PMID: 22388890; PubMed Central PMCID:  
595 PMCPMC3319518.
- 596 7. Sheng K, Liang X, Huang S, Xu W. The role of histone ubiquitination during spermatogenesis.  
597 *Biomed Res Int.* 2014;2014:870695. Epub 2014/05/19. doi: 10.1155/2014/870695. PubMed PMID:  
598 24963488; PubMed Central PMCID: PMCPMC4052122.
- 599 8. Pan X, Chen X, Tong X, Tang C, Li J. Ppp2ca knockout in mice spermatogenesis. *Reproduction.*  
600 2015;149(4):385-91. Epub 2015/01/27. doi: 10.1530/REP-14-0231. PubMed PMID: 25628439.

- 601 9. Ferreira M, Boens S, Winkler C, Szekér K, Verbinnen I, Van Eynde A, et al. The protein  
602 phosphatase 1 regulator NIPP1 is essential for mammalian spermatogenesis. *Sci Rep.*  
603 2017;7(1):13364. Epub 2017/10/17. doi: 10.1038/s41598-017-13809-y. PubMed PMID: 29042623;  
604 PubMed Central PMCID: PMC5645368.
- 605 10. Pang A, Rennert O. Protein acetylation and spermatogenesis. *Reprod Syst Sex Disord.*  
606 2013;Suppl 1:5. PubMed PMID: 25332843; PubMed Central PMCID: PMC4201854.
- 607 11. Jiang H, Gao Q, Zheng W, Yin S, Wang L, Zhong L, et al. MOF influences meiotic expansion of  
608 H2AX phosphorylation and spermatogenesis in mice. *PLoS Genet.* 2018;14(5):e1007300. Epub  
609 2018/05/24. doi: 10.1371/journal.pgen.1007300. PubMed PMID: 29795555; PubMed Central PMCID:  
610 PMC6019819.
- 611 12. Culligan KM, Britt AB. Both ATM and ATR promote the efficient and accurate processing of  
612 programmed meiotic double-strand breaks. *Plant J.* 2008;55(4):629-38. Epub 2008/04/24. doi:  
613 10.1111/j.1365-313X.2008.03530.x. PubMed PMID: 18435824.
- 614 13. Clement TM, Inselman AL, Goulding EH, Willis WD, Eddy EM. Disrupting Cyclin Dependent  
615 Kinase 1 in Spermatocytes Causes Late Meiotic Arrest and Infertility in Mice. *Biol Reprod.*  
616 2015;93(6):137. Epub 2015/10/21. doi: 10.1095/biolreprod.115.134940. PubMed PMID: 26490841;  
617 PubMed Central PMCID: PMC4712696.
- 618 14. Castillo J, Knol JC, Korver CM, Piersma SR, Pham TV, de Goeij-de Haas RR, et al. Human Testis  
619 Phosphoproteome Reveals Kinases as Potential Targets in Spermatogenesis and Testicular Cancer.  
620 *Mol Cell Proteomics.* 2019;18(Suppl 1):S132-S44. Epub 2019/01/25. doi:  
621 10.1074/mcp.RA118.001278. PubMed PMID: 30683686; PubMed Central PMCID: PMC6427237.
- 622 15. Nottke AC, Kim HM, Colaiácovo MP. Wrestling with Chromosomes: The Roles of SUMO  
623 During Meiosis. *Adv Exp Med Biol.* 2017;963:185-96. doi: 10.1007/978-3-319-50044-7\_11. PubMed  
624 PMID: 28197913; PubMed Central PMCID: PMC5518791.
- 625 16. Gaysinskaya V, Miller BF, De Luca C, van der Heijden GW, Hansen KD, Bortvin A. Transient  
626 reduction of DNA methylation at the onset of meiosis in male mice. *Epigenetics Chromatin.*

- 627 2018;11(1):15. Epub 2018/04/04. doi: 10.1186/s13072-018-0186-0. PubMed PMID: 29618374;  
628 PubMed Central PMCID: PMC5883305.
- 629 17. Bell EL, Nagamori I, Williams EO, Del Rosario AM, Bryson BD, Watson N, et al. SirT1 is  
630 required in the male germ cell for differentiation and fecundity in mice. *Development*.  
631 2014;141(18):3495-504. Epub 2014/08/22. doi: 10.1242/dev.110627. PubMed PMID: 25142464;  
632 PubMed Central PMCID: PMC4197722.
- 633 18. Deota S, Chattopadhyay T, Ramachandran D, Armstrong E, Camacho B, Maniyadath B, et al.  
634 Identification of a Tissue-Restricted Isoform of SIRT1 Defines a Regulatory Domain that Encodes  
635 Specificity. *Cell Rep*. 2017;18(13):3069-77. doi: 10.1016/j.celrep.2017.03.012. PubMed PMID:  
636 28355560; PubMed Central PMCID: PMC5545126.
- 637 19. Coussens M, Maresh JG, Yanagimachi R, Maeda G, Allsopp R. Sirt1 deficiency attenuates  
638 spermatogenesis and germ cell function. *PLoS One*. 2008;3(2):e1571. Epub 2008/02/14. doi:  
639 10.1371/journal.pone.0001571. PubMed PMID: 18270565; PubMed Central PMCID:  
640 PMC2216432.
- 641 20. Kolthur-Seetharam U, Teerds K, de Rooij DG, Wendling O, McBurney M, Sassone-Corsi P, et  
642 al. The histone deacetylase SIRT1 controls male fertility in mice through regulation of hypothalamic-  
643 pituitary gonadotropin signaling. *Biol Reprod*. 2009;80(2):384-91. Epub 2008/11/07. doi:  
644 10.1095/biolreprod.108.070193. PubMed PMID: 18987333.
- 645 21. Seifert EL, Caron AZ, Morin K, Coulombe J, He XH, Jardine K, et al. SirT1 catalytic activity is  
646 required for male fertility and metabolic homeostasis in mice. *Faseb j*. 2012;26(2):555-66. Epub  
647 2011/10/19. doi: 10.1096/fj.11-193979. PubMed PMID: 22006156.
- 648 22. Liu C, Song Z, Wang L, Yu H, Liu W, Shang Y, et al. Sirt1 regulates acrosome biogenesis by  
649 modulating autophagic flux during spermiogenesis in mice. *Development*. 2017;144(3):441-51. Epub  
650 2016/12/23. doi: 10.1242/dev.147074. PubMed PMID: 28003215.
- 651 23. Di Sante G, Wang L, Wang C, Jiao X, Casimiro MC, Chen K, et al. Sirt1-deficient mice have  
652 hypogonadotropic hypogonadism due to defective GnRH neuronal migration. *Mol Endocrinol*.

- 653 2015;29(2):200-12. Epub 2014/12/30. doi: 10.1210/me.2014-1228. PubMed PMID: 25545407;  
654 PubMed Central PMCID: PMC4318884.
- 655 24. McBurney MW, Yang X, Jardine K, Hixon M, Boekelheide K, Webb JR, et al. The mammalian  
656 SIR2alpha protein has a role in embryogenesis and gametogenesis. *Mol Cell Biol.* 2003;23(1):38-54.  
657 PubMed PMID: 12482959.
- 658 25. Dobbin MM, Madabhushi R, Pan L, Chen Y, Kim D, Gao J, et al. SIRT1 collaborates with ATM  
659 and HDAC1 to maintain genomic stability in neurons. *Nat Neurosci.* 2013;16(8):1008-15. Epub  
660 2013/07/16. doi: 10.1038/nn.3460. PubMed PMID: 23852118; PubMed Central PMCID:  
661 PMC4758134.
- 662 26. Uhl M, Csernok A, Aydin S, Kreienberg R, Wiesmuller L, Gatz SA. Role of SIRT1 in homologous  
663 recombination. *DNA Repair (Amst).* 2010;9(4):383-93. Epub 2010/01/26. doi:  
664 10.1016/j.dnarep.2009.12.020. PubMed PMID: 20097625.
- 665 27. Yamagata K, Kitabayashi I. Sirt1 physically interacts with Tip60 and negatively regulates  
666 Tip60-mediated acetylation of H2AX. *Biochem Biophys Res Commun.* 2009;390(4):1355-60. Epub  
667 2009/11/10. doi: 10.1016/j.bbrc.2009.10.156. PubMed PMID: 19895790.
- 668 28. Yuan Z, Seto E. A functional link between SIRT1 deacetylase and NBS1 in DNA damage  
669 response. *Cell Cycle.* 2007;6(23):2869-71. Epub 2007/12/25. doi: 10.4161/cc.6.23.5026. PubMed  
670 PMID: 18156798.
- 671 29. Zannini L, Buscemi G, Kim JE, Fontanella E, Delia D. DBC1 phosphorylation by ATM/ATR  
672 inhibits SIRT1 deacetylase in response to DNA damage. *J Mol Cell Biol.* 2012;4(5):294-303. Epub  
673 2012/06/28. doi: 10.1093/jmcb/mjs035. PubMed PMID: 22735644.
- 674 30. Zhao M, Geng R, Guo X, Yuan R, Zhou X, Zhong Y, et al. PCAF/GCN5-Mediated Acetylation of  
675 RPA1 Promotes Nucleotide Excision Repair. *Cell Rep.* 2017;20(9):1997-2009. Epub 2017/08/31. doi:  
676 10.1016/j.celrep.2017.08.015. PubMed PMID: 28854354.
- 677 31. Luo J, Nikolaev AY, Imai S, Chen D, Su F, Shiloh A, et al. Negative control of p53 by Sir2alpha  
678 promotes cell survival under stress. *Cell.* 2001;107(2):137-48. PubMed PMID: 11672522.

- 679 32. Pittman DL, Cobb J, Schimenti KJ, Wilson LA, Cooper DM, Brignull E, et al. Meiotic prophase  
680 arrest with failure of chromosome synapsis in mice deficient for Dmc1, a germline-specific RecA  
681 homolog. *Mol Cell*. 1998;1(5):697-705. Epub 1998/07/14. PubMed PMID: 9660953.
- 682 33. Bannister LA, Pezza RJ, Donaldson JR, de Rooij DG, Schimenti KJ, Camerini-Otero RD, et al. A  
683 dominant, recombination-defective allele of Dmc1 causing male-specific sterility. *PLoS Biol*.  
684 2007;5(5):e105. Epub 2007/04/12. doi: 10.1371/journal.pbio.0050105. PubMed PMID: 17425408;  
685 PubMed Central PMCID: PMCPMC1847842.
- 686 34. Eaker S, Cobb J, Pyle A, Handel MA. Meiotic prophase abnormalities and metaphase cell  
687 death in MLH1-deficient mouse spermatocytes: insights into regulation of spermatogenic progress.  
688 *Dev Biol*. 2002;249(1):85-95. Epub 2002/09/10. PubMed PMID: 12217320.
- 689 35. Edelman W, Cohen PE, Kane M, Lau K, Morrow B, Bennett S, et al. Meiotic pachytene arrest  
690 in MLH1-deficient mice. *Cell*. 1996;85(7):1125-34. Epub 1996/06/28. PubMed PMID: 8674118.
- 691 36. Barlow C, Liyanage M, Moens PB, Tarsounas M, Nagashima K, Brown K, et al. Atm deficiency  
692 results in severe meiotic disruption as early as leptotema of prophase I. *Development*.  
693 1998;125(20):4007-17. Epub 1998/09/15. PubMed PMID: 9735362.
- 694 37. Lange J, Pan J, Cole F, Thelen MP, Jasin M, Keeney S. ATM controls meiotic double-strand-  
695 break formation. *Nature*. 2011;479(7372):237-40. Epub 2011/10/18. doi: 10.1038/nature10508.  
696 PubMed PMID: 22002603; PubMed Central PMCID: PMCPMC3213282.
- 697 38. Li XC, Schimenti JC. Mouse pachytene checkpoint 2 (trip13) is required for completing  
698 meiotic recombination but not synapsis. *PLoS Genet*. 2007;3(8):e130. Epub 2007/08/19. doi:  
699 10.1371/journal.pgen.0030130. PubMed PMID: 17696610; PubMed Central PMCID:  
700 PMCPMC1941754.
- 701 39. Cherry SM, Adelman CA, Theunissen JW, Hassold TJ, Hunt PA, Petrini JH. The Mre11 complex  
702 influences DNA repair, synapsis, and crossing over in murine meiosis. *Curr Biol*. 2007;17(4):373-8.  
703 Epub 2007/02/13. doi: 10.1016/j.cub.2006.12.048. PubMed PMID: 17291760; PubMed Central  
704 PMCID: PMCPMC1839861.

- 705 40. Kang J, Bronson RT, Xu Y. Targeted disruption of NBS1 reveals its roles in mouse  
706 development and DNA repair. *Embo j.* 2002;21(6):1447-55. Epub 2002/03/13. doi:  
707 10.1093/emboj/21.6.1447. PubMed PMID: 11889050; PubMed Central PMCID: PMC125926.
- 708 41. Bellani MA, Romanienko PJ, Cairatti DA, Camerini-Otero RD. SPO11 is required for sex-body  
709 formation, and Spo11 heterozygosity rescues the prophase arrest of *Atm*<sup>-/-</sup> spermatocytes. *J Cell Sci.*  
710 2005;118(Pt 15):3233-45. Epub 2005/07/07. doi: 10.1242/jcs.02466. PubMed PMID: 15998665.
- 711 42. Pacheco S, Marcet-Ortega M, Lange J, Jasin M, Keeney S, Roig I. The ATM signaling cascade  
712 promotes recombination-dependent pachytene arrest in mouse spermatocytes. *PLoS Genet.*  
713 2015;11(3):e1005017. Epub 2015/03/15. doi: 10.1371/journal.pgen.1005017. PubMed PMID:  
714 25768017; PubMed Central PMCID: PMC14358828.
- 715 43. Marcet-Ortega M, Pacheco S, Martinez-Marchal A, Castillo H, Flores E, Jasin M, et al. p53 and  
716 TAp63 participate in the recombination-dependent pachytene arrest in mouse spermatocytes. *PLoS*  
717 *Genet.* 2017;13(6):e1006845. Epub 2017/06/16. doi: 10.1371/journal.pgen.1006845. PubMed PMID:  
718 28617799; PubMed Central PMCID: PMC5491309.
- 719 44. Wang RH, Sengupta K, Li C, Kim HS, Cao L, Xiao C, et al. Impaired DNA damage response,  
720 genome instability, and tumorigenesis in *SIRT1* mutant mice. *Cancer Cell.* 2008;14(4):312-23.  
721 PubMed PMID: 18835033.
- 722 45. Mahadevaiah SK, Turner JM, Baudat F, Rogakou EP, de Boer P, Blanco-Rodriguez J, et al.  
723 Recombinational DNA double-strand breaks in mice precede synapsis. *Nat Genet.* 2001;27(3):271-6.  
724 Epub 2001/03/10. doi: 10.1038/85830. PubMed PMID: 11242108.
- 725 46. Abe H, Alavattam KG, Kato Y, Castrillon DH, Pang Q, Andreassen PR, et al. CHEK1 coordinates  
726 DNA damage signaling and meiotic progression in the male germline of mice. *Hum Mol Genet.*  
727 2018;27(7):1136-49. doi: 10.1093/hmg/ddy022. PubMed PMID: 29360988; PubMed Central PMCID:  
728 PMC6185175.

- 729 47. Wang L, Valiskova B, Forejt J. Cisplatin-induced DNA double-strand breaks promote meiotic  
730 chromosome synapsis in PRDM9-controlled mouse hybrid sterility. *Elife*. 2018;7. Epub 2018/12/28.  
731 doi: 10.7554/eLife.42511. PubMed PMID: 30592461; PubMed Central PMCID: PMC6324875.
- 732 48. Carofiglio F, Sleddens-Linkels E, Wassenaar E, Inagaki A, van Cappellen WA, Grootegoed JA,  
733 et al. Repair of exogenous DNA double-strand breaks promotes chromosome synapsis in SPO11-  
734 mutant mouse meiocytes, and is altered in the absence of HORMAD1. *DNA Repair (Amst)*.  
735 2018;63:25-38. Epub 2018/01/31. doi: 10.1016/j.dnarep.2018.01.007. PubMed PMID: 29414051.
- 736 49. Cai X, Li J, Yang Q, Shi Q. Gamma-irradiation increased meiotic crossovers in mouse  
737 spermatocytes. *Mutagenesis*. 2011;26(6):721-7. Epub 2011/07/21. doi: 10.1093/mutage/ger038.  
738 PubMed PMID: 21778358.
- 739 50. Hanneman WH, Legare ME, Sweeney S, Schimenti JC. Cisplatin increases meiotic crossing-  
740 over in mice. *Proc Natl Acad Sci U S A*. 1997;94(16):8681-5. doi: 10.1073/pnas.94.16.8681. PubMed  
741 PMID: 9238037; PubMed Central PMCID: PMC23075.
- 742 51. Yuan Z, Zhang X, Sengupta N, Lane WS, Seto E. SIRT1 regulates the function of the Nijmegen  
743 breakage syndrome protein. *Mol Cell*. 2007;27(1):149-62. Epub 2007/07/07. doi:  
744 10.1016/j.molcel.2007.05.029. PubMed PMID: 17612497; PubMed Central PMCID:  
745 PMC2679807.
- 746 52. Schölz C, Weinert BT, Wagner SA, Beli P, Miyake Y, Qi J, et al. Acetylation site specificities of  
747 lysine deacetylase inhibitors in human cells. *Nat Biotechnol*. 2015;33(4):415-23. Epub 2015/03/09.  
748 doi: 10.1038/nbt.3130. PubMed PMID: 25751058.
- 749 53. Chen Y, Zhao W, Yang JS, Cheng Z, Luo H, Lu Z, et al. Quantitative acetylome analysis reveals  
750 the roles of SIRT1 in regulating diverse substrates and cellular pathways. *Mol Cell Proteomics*.  
751 2012;11(10):1048-62. Epub 2012/07/23. doi: 10.1074/mcp.M112.019547. PubMed PMID: 22826441;  
752 PubMed Central PMCID: PMC3494151.
- 753 54. Coogan TP, Rosenblum IY. DNA double-strand damage and repair following gamma-  
754 irradiation in isolated spermatogenic cells. *Mutat Res*. 1988;194(3):183-91. PubMed PMID: 3185581.

- 755 55. Bolcun-Filas E, Rinaldi VD, White ME, Schimenti JC. Reversal of female infertility by Chk2  
756 ablation reveals the oocyte DNA damage checkpoint pathway. *Science*. 2014;343(6170):533-6. Epub  
757 2014/02/01. doi: 10.1126/science.1247671. PubMed PMID: 24482479; PubMed Central PMCID:  
758 PMC4048839.
- 759 56. Gao J, Colaiácovo MP. Zipping and Unzipping: Protein Modifications Regulating  
760 Synaptonemal Complex Dynamics. *Trends Genet*. 2018;34(3):232-45. Epub 2017/12/28. doi:  
761 10.1016/j.tig.2017.12.001. PubMed PMID: 29290403; PubMed Central PMCID: PMC5834363.
- 762 57. Ali I, Conrad RJ, Verdin E, Ott M. Lysine Acetylation Goes Global: From Epigenetics to  
763 Metabolism and Therapeutics. *Chem Rev*. 2018;118(3):1216-52. Epub 2018/02/06. doi:  
764 10.1021/acs.chemrev.7b00181. PubMed PMID: 29405707.
- 765 58. Narita T, Weinert BT, Choudhary C. Functions and mechanisms of non-histone protein  
766 acetylation. *Nat Rev Mol Cell Biol*. 2019;20(3):156-74. doi: 10.1038/s41580-018-0081-3. PubMed  
767 PMID: 30467427.
- 768 59. Drazic A, Myklebust LM, Ree R, Arnesen T. The world of protein acetylation. *Biochim Biophys*  
769 *Acta*. 2016;1864(10):1372-401. Epub 2016/06/11. doi: 10.1016/j.bbapap.2016.06.007. PubMed  
770 PMID: 27296530.
- 771 60. Crichton JH, Read D, Adams IR. Defects in meiotic recombination delay progression through  
772 pachytene in Tex19.1. *Chromosoma*. 2018;127(4):437-59. Epub 2018/06/16. doi: 10.1007/s00412-  
773 018-0674-9. PubMed PMID: 29907896; PubMed Central PMCID: PMC6208735.
- 774 61. Peters AH, Plug AW, van Vugt MJ, de Boer P. A drying-down technique for the spreading of  
775 mammalian meiocytes from the male and female germline. *Chromosome Res*. 1997;5(1):66-8.  
776 PubMed PMID: 9088645.
- 777 62. Shechter D, Dormann HL, Allis CD, Hake SB. Extraction, purification and analysis of histones.  
778 *Nat Protoc*. 2007;2(6):1445-57. doi: 10.1038/nprot.2007.202. PubMed PMID: 17545981.
- 779 63. Perez-Riverol Y, Csordas A, Bai J, Bernal-Llinares M, Hewapathirana S, Kundu DJ, et al. The  
780 PRIDE database and related tools and resources in 2019: improving support for quantification data.



781 Nucleic Acids Res. 2019;47(D1):D442-D50. doi: 10.1093/nar/gky1106. PubMed PMID: 30395289;

782 PubMed Central PMCID: PMC6323896.

783 64. Voisinne G, García-Blesa A, Chaoui K, Fiore F, Bergot E, Girard L, et al. Co-recruitment

784 analysis of the CBL and CBLB signalosomes in primary T cells identifies CD5 as a key regulator of TCR-

785 induced ubiquitylation. Mol Syst Biol. 2016;12(7):876. Epub 2016/07/29. doi:

786 10.15252/msb.20166837. PubMed PMID: 27474268; PubMed Central PMCID: PMC6323896.

787

788 **Figure Legends**

789 **Figure 1. Hyper-acetylation of proteins in *Sirt1*<sup>Δmeio</sup>.**

790 (A) Schematic of the strategy for generating *Sirt1*<sup>Δmeio</sup> mice. (B) Immunoblot of SIRT1  
791 from testis lysate of *Sirt1*<sup>WT</sup> and *Sirt1*<sup>Δmeio</sup> mice. Arrows point to two isoforms of  
792 SIRT1, which have exon-4 excision. (C, D) Representative immunoblots of (C)  
793 H3K9Ac and (D) H4K16Ac in acid-extracted histones from testis and quantifications  
794 from triplicate samples. Students t-test done to determine statistical significance (E)  
795 Immunoblot of testis lysates from *Sirt1*<sup>WT</sup> and *Sirt1*<sup>Δmeio</sup> mice using with pan anti-  
796 acetyl lysine antibody. (F) Mean intensity profile of acetylated protein bands, from an  
797 independent immunoblot, from *Sirt1*<sup>WT</sup> and *Sirt1*<sup>Δmeio</sup> mice testis lysates.  
798 Hyperacetylated bands at the mentioned molecular weights, based on mobility, are  
799 indicated. Plot showing mean of four samples per genotype.

800

801 **Figure 2. Distribution of meiotic populations and synapsis is unaffected in**  
802 ***Sirt1*<sup>Δmeio</sup> spermatocytes.**

803 (A, B) Progression of meiosis in mice at 24 d.p.p., assessed by staining with SYCP3  
804 and SYCP1 in (A) *Sirt1*<sup>WT</sup> and (B) *Sirt1*<sup>Δmeio</sup> mice. Scale bar: 10μm. (C, D)  
805 Distribution of cells at different prophase I stages, (C) at steady state (from 5 weeks  
806 old mice) and (D) at first wave (from 24 d.p.p. mice). Mean ± SEM, N=4 mice per  
807 genotype, n=563 for *Sirt1*<sup>WT</sup> and n=616 for *Sirt1*<sup>Δmeio</sup>. (E) Distribution of pachytene  
808 cells at early, mid or late stages. (F) Average autosomal SC length at late pachytene  
809 (MLH1 positive) cells. Mean ± SEM, N=4 mice per genotype, n=86 for *Sirt1*<sup>WT</sup> and  
810 n=88 for *Sirt1*<sup>Δmeio</sup> mice. Students t-test and Mann-Whitney U test done to determine  
811 statistical significance in Fig 2E and 2F respectively.

812 **Figure 3. Abnormal retention of  $\gamma$ H2AX in *Sirt1* <sup>$\Delta$ meio</sup> mice.**

813 (A-B) Immunostaining for SYCP3 and  $\gamma$ H2AX showing abnormal retention of  $\gamma$ H2AX  
814 patches in late pachytene stage in *Sirt1* <sup>$\Delta$ meio</sup> spreads (B). (C) Representation of the  
815 scheme for classification of pachytene cells based on  $\gamma$ H2AX pattern on autosomes,  
816 adapted from Abe H. et. al. [46]. (D) Integrative analyses of spermatocytes with  
817  $\gamma$ H2AX staining from *Sirt1*<sup>WT</sup> and *Sirt1* <sup>$\Delta$ meio</sup> mice; as described in (C). N=4 per  
818 genotype. n=308 for *Sirt1*<sup>WT</sup> and n=384 for *Sirt1* <sup>$\Delta$ meio</sup> mice.

819

820 **Figure 4. Meiotic loss of SIRT1 causes persistence of DSB repair intermediates**  
821 **in pachytene cells.**

822 (A, C) Representative images of cells immunostained for SYCP3 (red) and RPA32  
823 (green) at (A) early and (C) late pachytene stages. Scale bar 10 $\mu$ m. (B, D)  
824 Quantification of number of RPA foci co-localizing with SYCP3 axis at (B) early and  
825 (D) late pachytene stages. Mean  $\pm$  SEM, N= 5 per genotype, n=44 for *Sirt1*<sup>WT</sup> and  
826 n=58 for *Sirt1* <sup>$\Delta$ meio</sup> mice for early pachytene, and n=142 for *Sirt1*<sup>WT</sup> and n=204 for  
827 *Sirt1* <sup>$\Delta$ meio</sup> mice for late pachytene. Quantitations from mice at both AH-1 and AH-2.  
828 Students t-test used for determining statistical significance.

829

830 **Figure 5. SIRT1 is required for normal cross over frequency**

831 (A) Representative images of cells immunostained for SYCP3 (red) and MLH1  
832 (green) at late pachytene stage. Scale bar 10 $\mu$ m. (B). Quantification of the total  
833 number of autosomal MLH1 foci per pachytene cell showing an increase in *Sirt1* <sup>$\Delta$ meio</sup>  
834 cells. Mean  $\pm$  SEM, Mann-Whitney U test done to determine statistical significance.

835 (C) Percentage of MLH1 positive XY chromosomes from *Sirt1*<sup>WT</sup> and *Sirt1*<sup>Δmeio</sup>  
836 pachytene spermatocytes. (D) Frequency distribution of MLH1 foci at late pachytene.  
837 (E) Percentage of bivalent autosomes with the indicated numbers of MLH1 foci. N= 4  
838 per genotype, n=94 from *Sirt1*<sup>WT</sup> and n=102 from *Sirt1*<sup>Δmeio</sup> mice.

839

840 **Figure 6. SIRT1 interactome in the testis reveals MRN components.**

841 (A) GO analysis of the proteins interacting with SIRT1 in testis. (B) Volcano plots  
842 depicting SIRT1 interacting proteins involved in meiosis (red). (C) STRING database  
843 analysis showing SIRT1 interaction network of, MRN/associated factors. (D)  
844 Proposed model describing the role of SIRT1 in regulating meiotic repair,  
845 recombination and progression possibly brought about by deacetylation of non-  
846 histone proteins that are key determinants of meiosis, as indicated.

847

848 **Figure 7. SIRT1 elicits checkpoint response and its loss results in**  
849 **hypersensitization of meiocytes to exogenous damage.**

850 (A) Schematic of the experimental paradigm followed for gamma irradiation of  
851 *Sirt1*<sup>WT</sup> and *Sirt1*<sup>Δmeio</sup> mice. (B) Integrative analyses  $\gamma$ H2AX staining in spermatocytes  
852 upon  $\gamma$ -irradiation, as described in Figure 2C. N=3 per genotype, n=294 for *Sirt1*<sup>WT</sup>  
853 and n=239 for *Sirt1*<sup>Δmeio</sup>. (C) Ratio of diplotene:pachytene stages following  $\gamma$ -  
854 irradiation, as indicated. (D) Quantification of the number of  $\gamma$ H2AX patches in  
855 diplotene cells following  $\gamma$ -irradiation. Mean  $\pm$  SEM, N=3 per genotype, n=20 for  
856 *Sirt1*<sup>WT</sup> and n=102 for *Sirt1*<sup>Δmeio</sup>. (E) Representative images of cells immunostained  
857 for SYCP3 (red) and  $\gamma$ H2AX (green) at early diplotene. Scale bar 10 $\mu$ m.

858

## Supporting Information

### 859 **Legends to Supplementary figures**

#### 860 **S1 Fig. Characterization of *Sirt1*<sup>Δmeio</sup> mice.**

861 (A-B) Genomic DNA PCR from testis and tail clip of *Sirt1*<sup>WT</sup> and *Sirt1*<sup>Δmeio</sup> mice, (A)  
862 upper band (900 bp) corresponds to the WT and the lower band (450 bp)  
863 corresponds to the floxed-out *Sirt1*, (B) upper band (750 bp) corresponds to the  
864 floxed locus and the lower band (550 bp) corresponds to the WT locus. (C) Flow  
865 cytometry-based quantification of spermatogenic cell populations based on their  
866 DNA content, from animals housed at two animal houses (AH-1 and AH-2). N=3 per  
867 genotype, quantifications from 30,000 cells per animal. (D) Representative testis  
868 sections stained with H&E, shows no difference in testis morphology. (E) TUNEL  
869 assay on testis sections to score for apoptosis, showing marginal difference between  
870 *Sirt1*<sup>WT</sup> and *Sirt1*<sup>Δmeio</sup> mice. Arrows represent TUNEL +ve cells. Scale bar 100 μm.  
871 (F-G) Spermatocyte spreads stained for SYCP3 (red) and (F) H3K9me3 (green) to  
872 mark centromeres and (G) TRF1 (green) to mark telomeres. Representative images  
873 of cells in diplotene stage are shown. Scale bar 10 μm.

874

#### 875 **S2 Fig. Synapsis is not altered at prophase I and metaphase I in *Sirt1*<sup>Δmeio</sup> mice.**

876 (A) Representative images of sspermatocytes in late pachytene, stained for SYCP3  
877 (red) and SMC3β (green). (B) DAPI stained metaphase spreads from *Sirt1*<sup>Δmeio</sup> mice.  
878 Scale bar 10μm.

879

880 **S3 Fig. Abnormal retention of  $\gamma$ H2AX in *Sirt1 $\Delta$ meio* cells.**

881 (A) Immunoblot of  $\gamma$ H2AX from testis lysate of *Sirt1<sup>WT</sup>* and *Sirt1 $\Delta$ meio* mice, showing  
882 higher levels in *Sirt1 $\Delta$ meio* cells, N=3 per genotype and quantifications from triplicate  
883 samples. (B) Percent pachytene cells with abnormal retention of  $\gamma$ H2AX. N=4 per  
884 genotype, n=308 for *Sirt1<sup>WT</sup>* and n=384 for *Sirt1 $\Delta$ meio* mice. (C-H) Percent pachytene  
885 cells at (C,F) early, (D,G) mid and (E,H) late stages, from animals housed at two  
886 animal houses, AH-1 and AH-2, respectively; classified as described in Fig 3C.

887

888 **S4 Fig. Persistent DSB repair intermediates in pachytene cells.**

889 Representative images of spermatocytes at late pachytene, stained for SYCP3 (red)  
890 and pRPA (green). Scale bar 10 $\mu$ m.

891

892 **S5 Fig. Acetylation status of histones and MRE11 is SIRT1-dependent.**

893 (A) Representative immunoblot for acetylation of acid extracted histones from  
894 *Sirt1<sup>WT</sup>* and *Sirt1 $\Delta$ meio* mice. (B) Immunoblot for acetylation of MRE11  
895 immunoprecipitated from control cells and cells treated with SIRT1 inhibitor EX527.

896

897 **S6 Fig. *Sirt1 $\Delta$ meio* cells are hypersensitive to genotoxic stress.**

898 (A-C) Percent pachytene cells, subjected to 3Gy irradiation, at (A) early, (B) mid and  
899 (C) late stages, classified as described in Fig 3C. (D-F) Percent pachytene cells,  
900 subjected to 6Gy irradiation, at (A) early, (B) mid and (C) late stages, classified as  
901 described in Fig 3C. N=3 per genotype, n=294 for *Sirt1<sup>WT</sup>* and n=239 for *Sirt1 $\Delta$ meio* for

902 3Gy irradiation and N=3 per genotype, n=180 for *Sirt1*<sup>WT</sup> and n=166 for *Sirt1*<sup>Δmeio</sup> for

903 6Gy irradiation.

904

905 **S1 Table. Interactome of SIRT1 in mammalian testes**

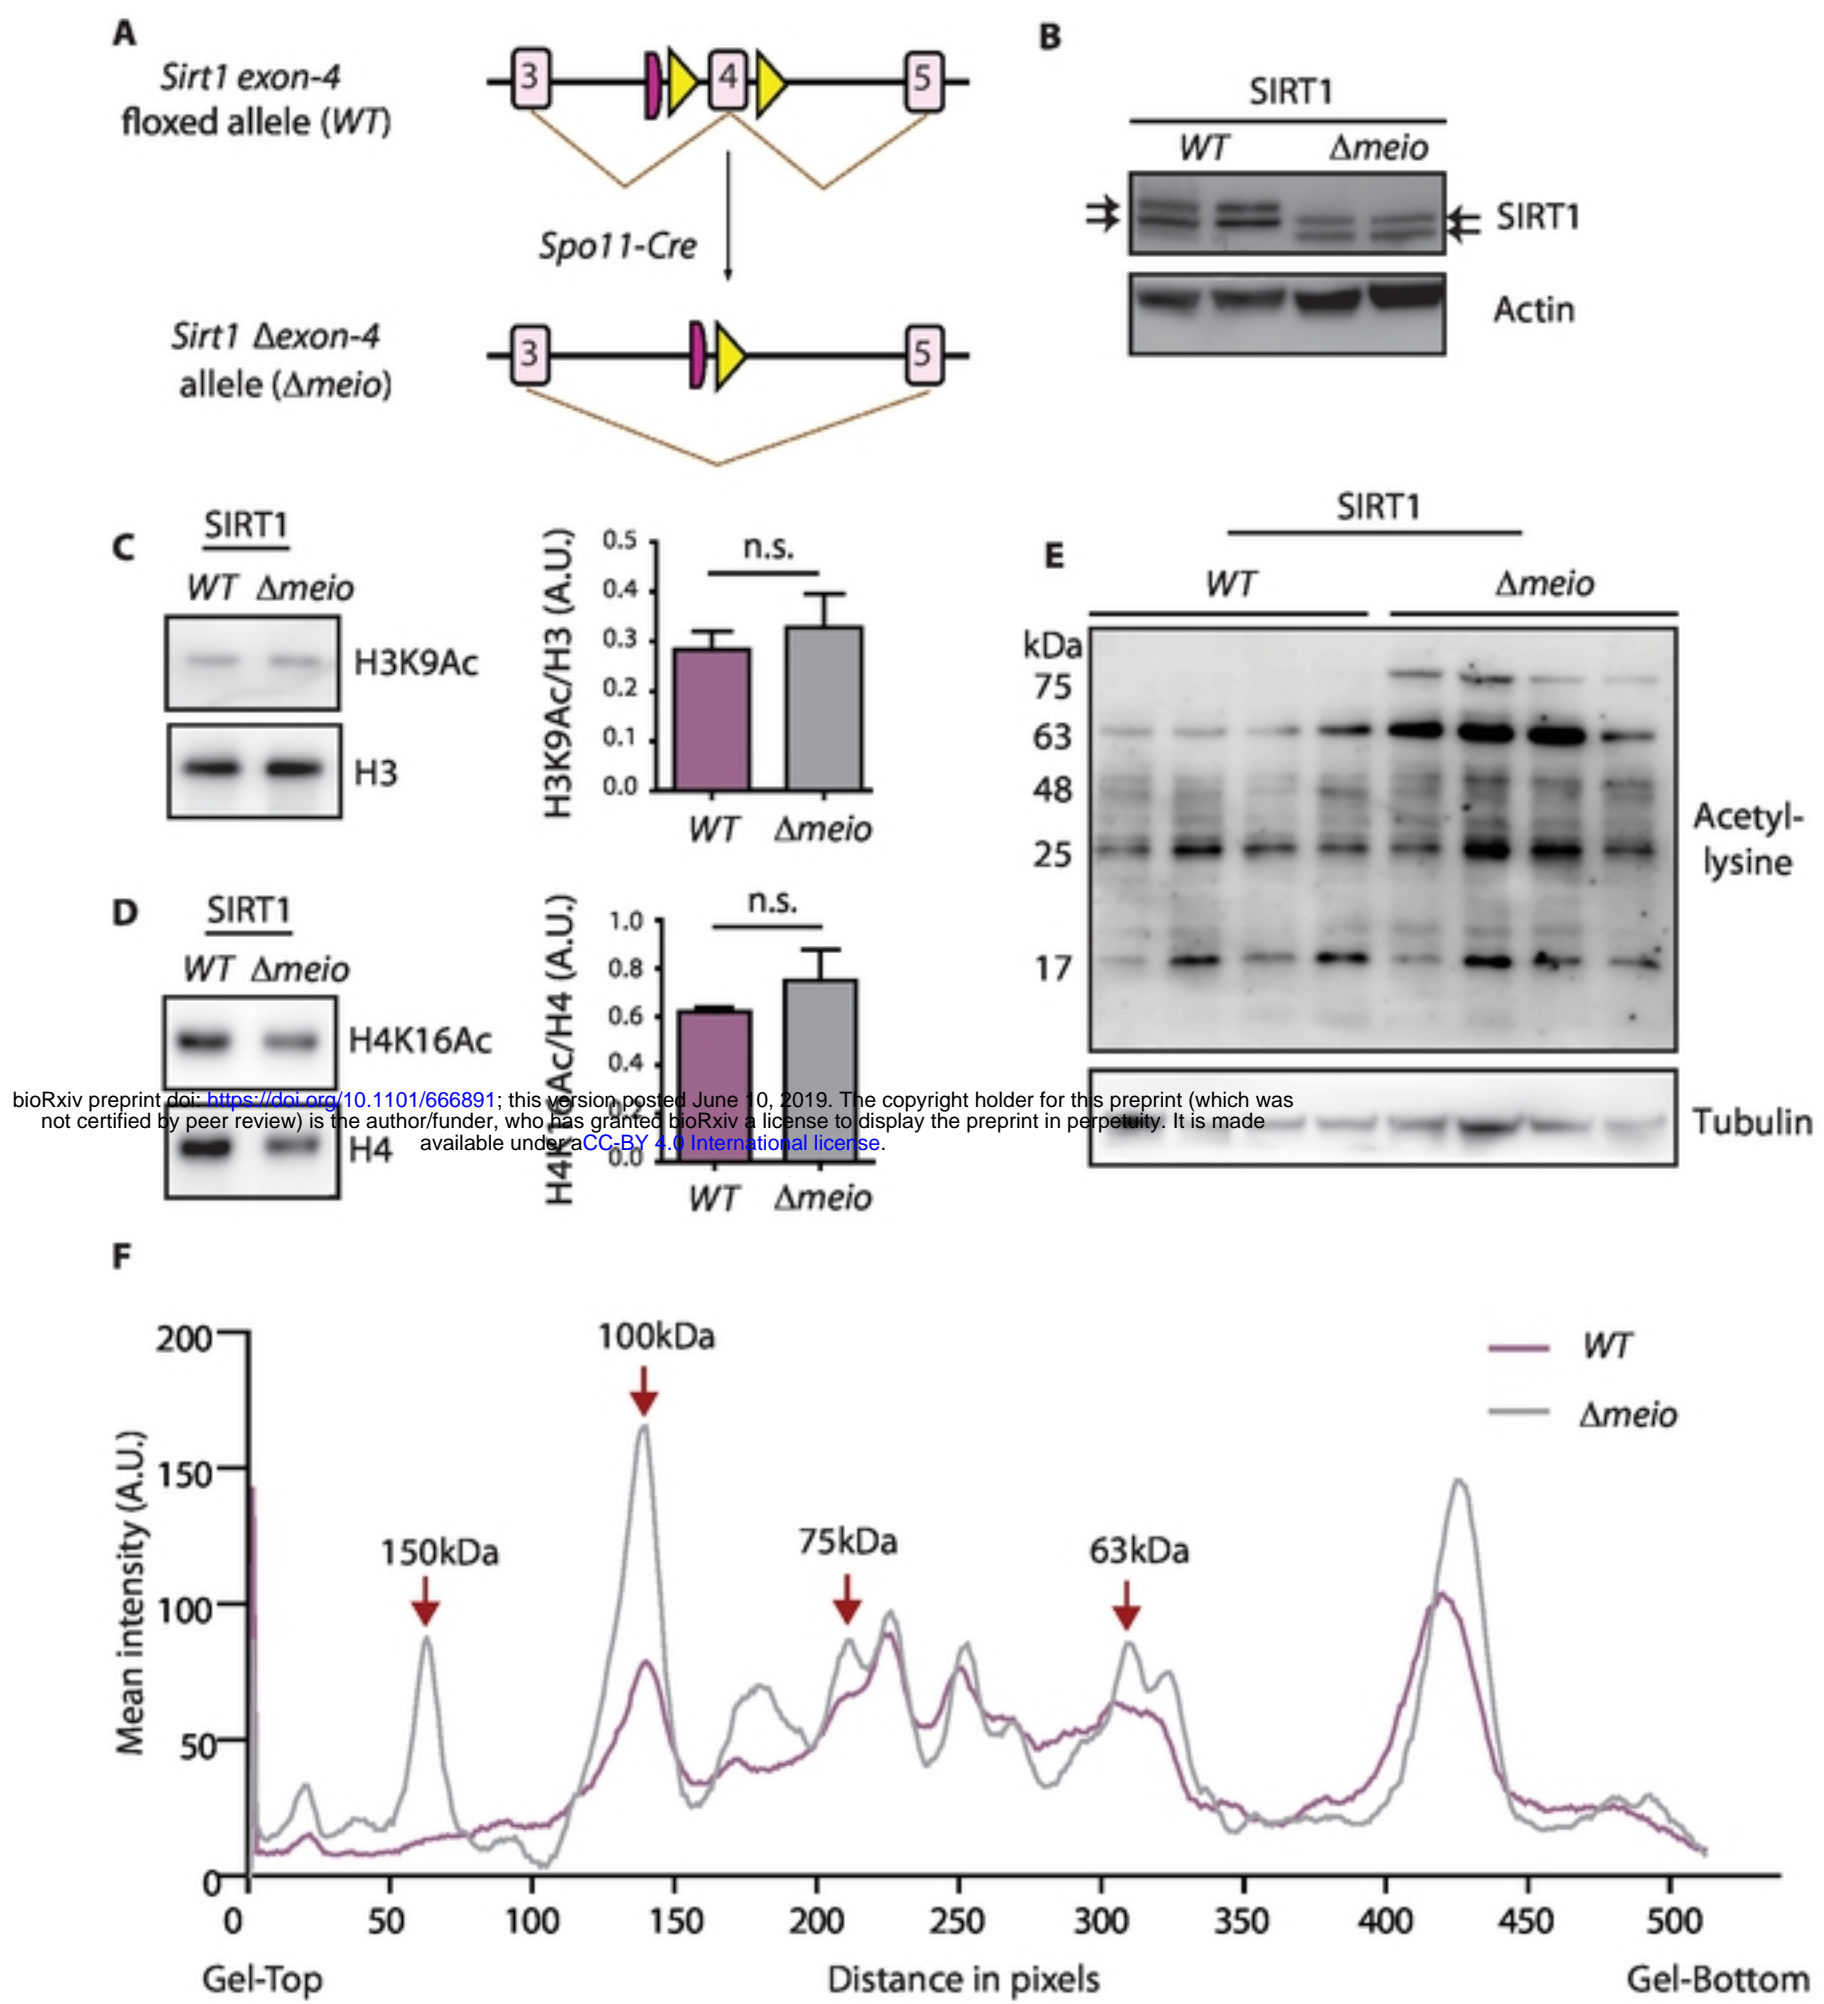

bioRxiv preprint doi: <https://doi.org/10.1101/666891>; this version posted June 10, 2019. The copyright holder for this preprint (which was not certified by peer review) is the author/funder, who has granted bioRxiv a license to display the preprint in perpetuity. It is made available under aCC-BY 4.0 International license.

**Figure-1**



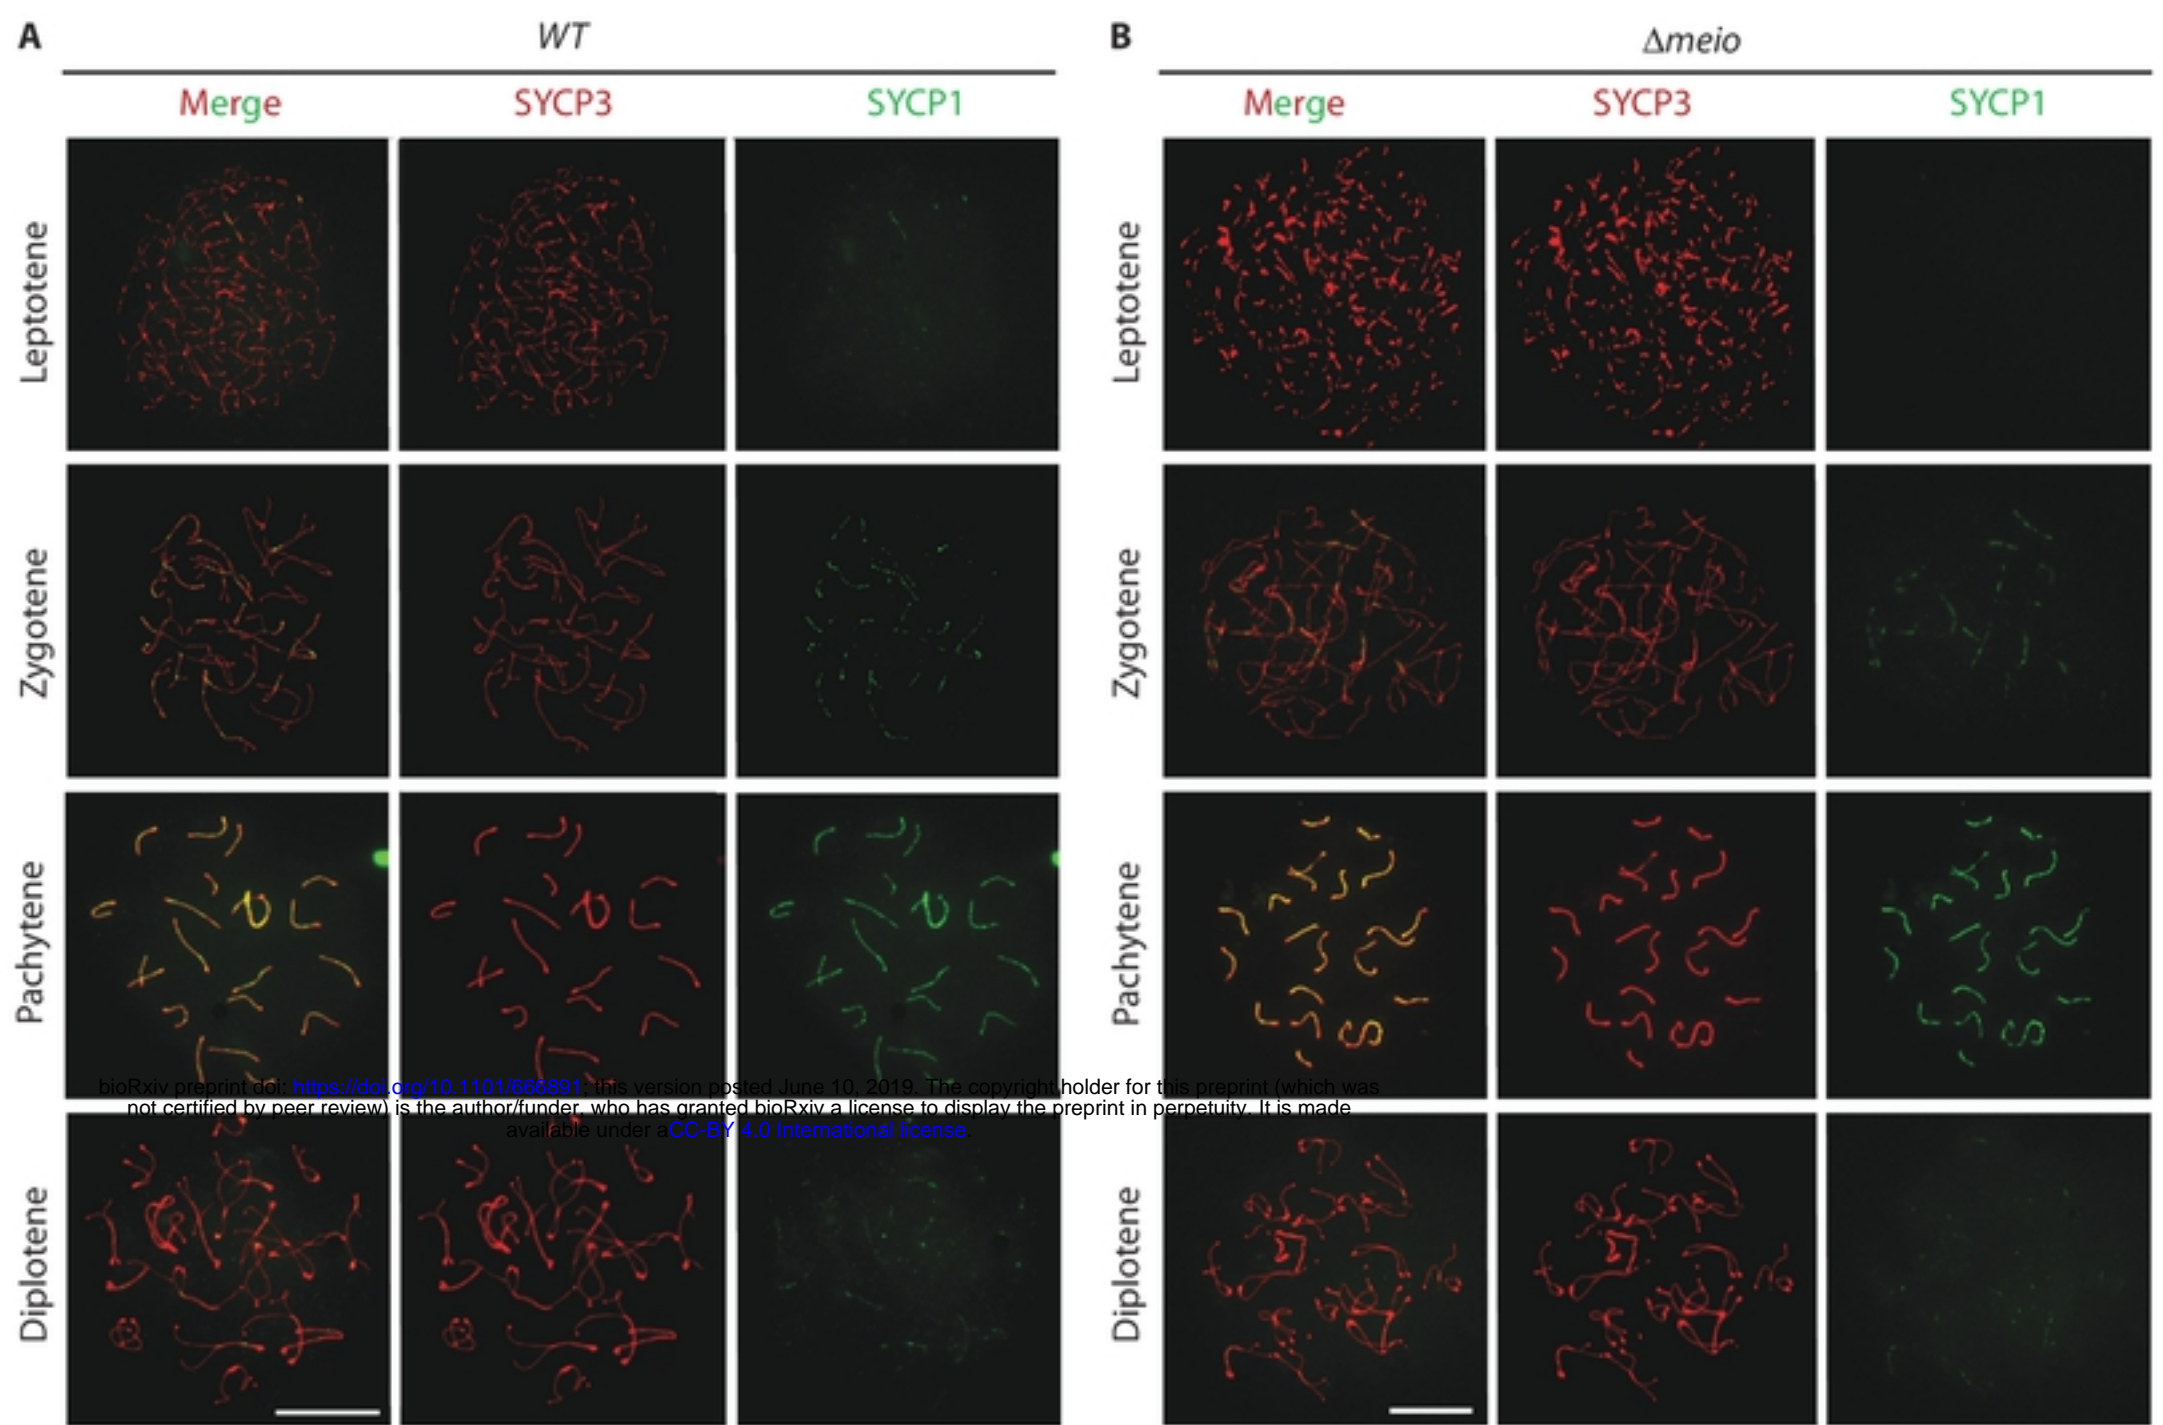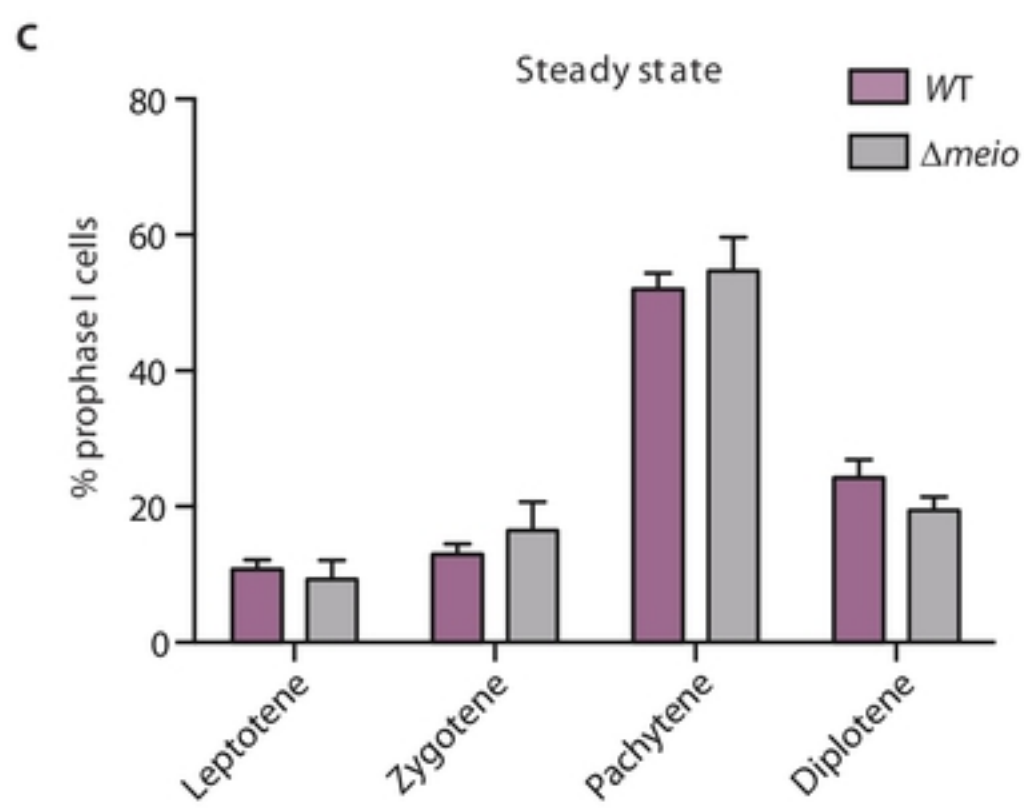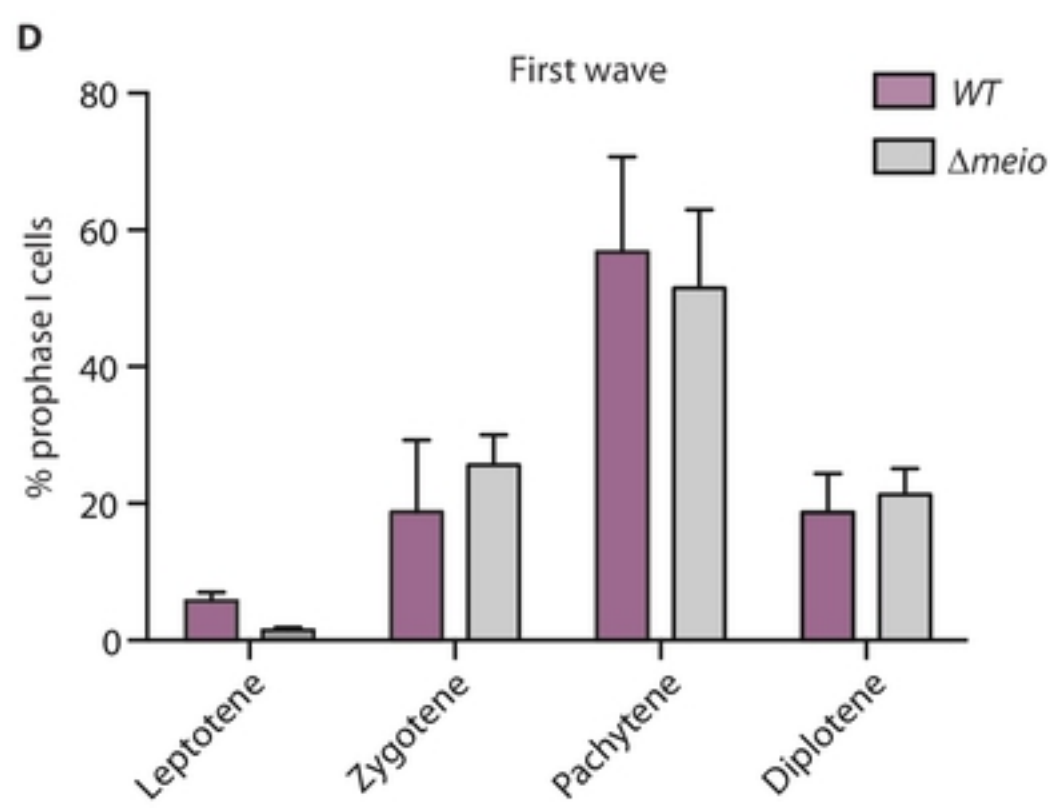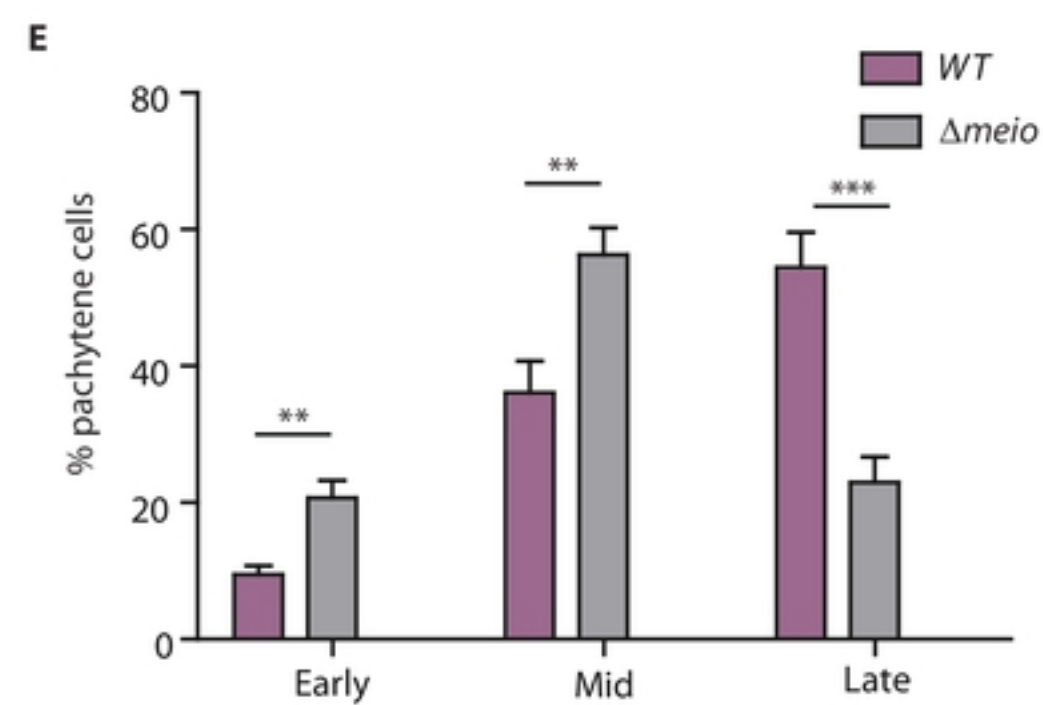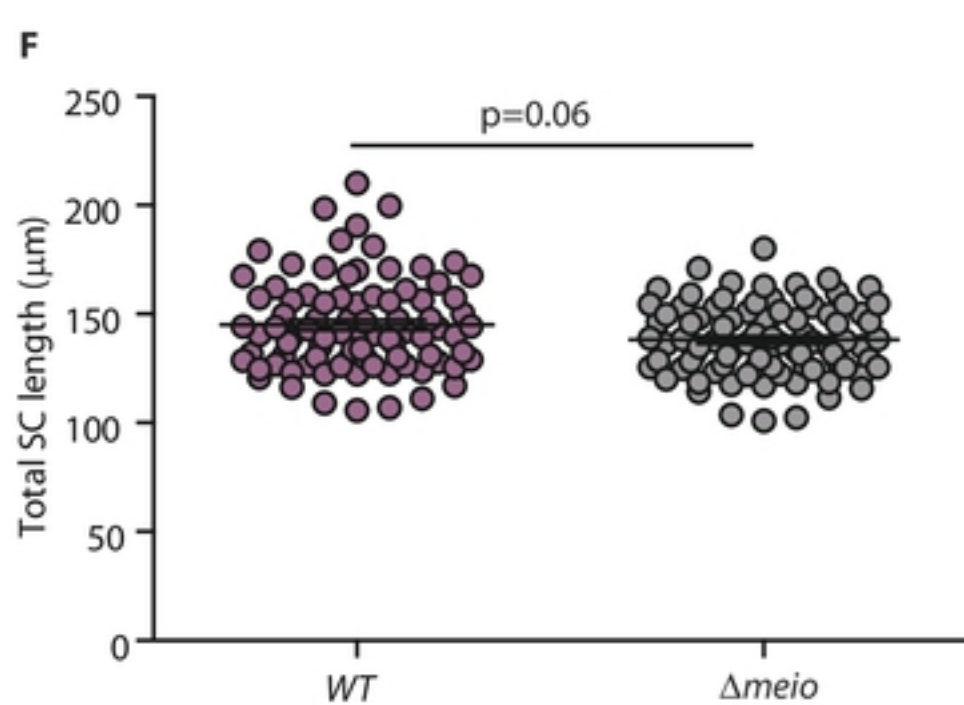

Figure-2



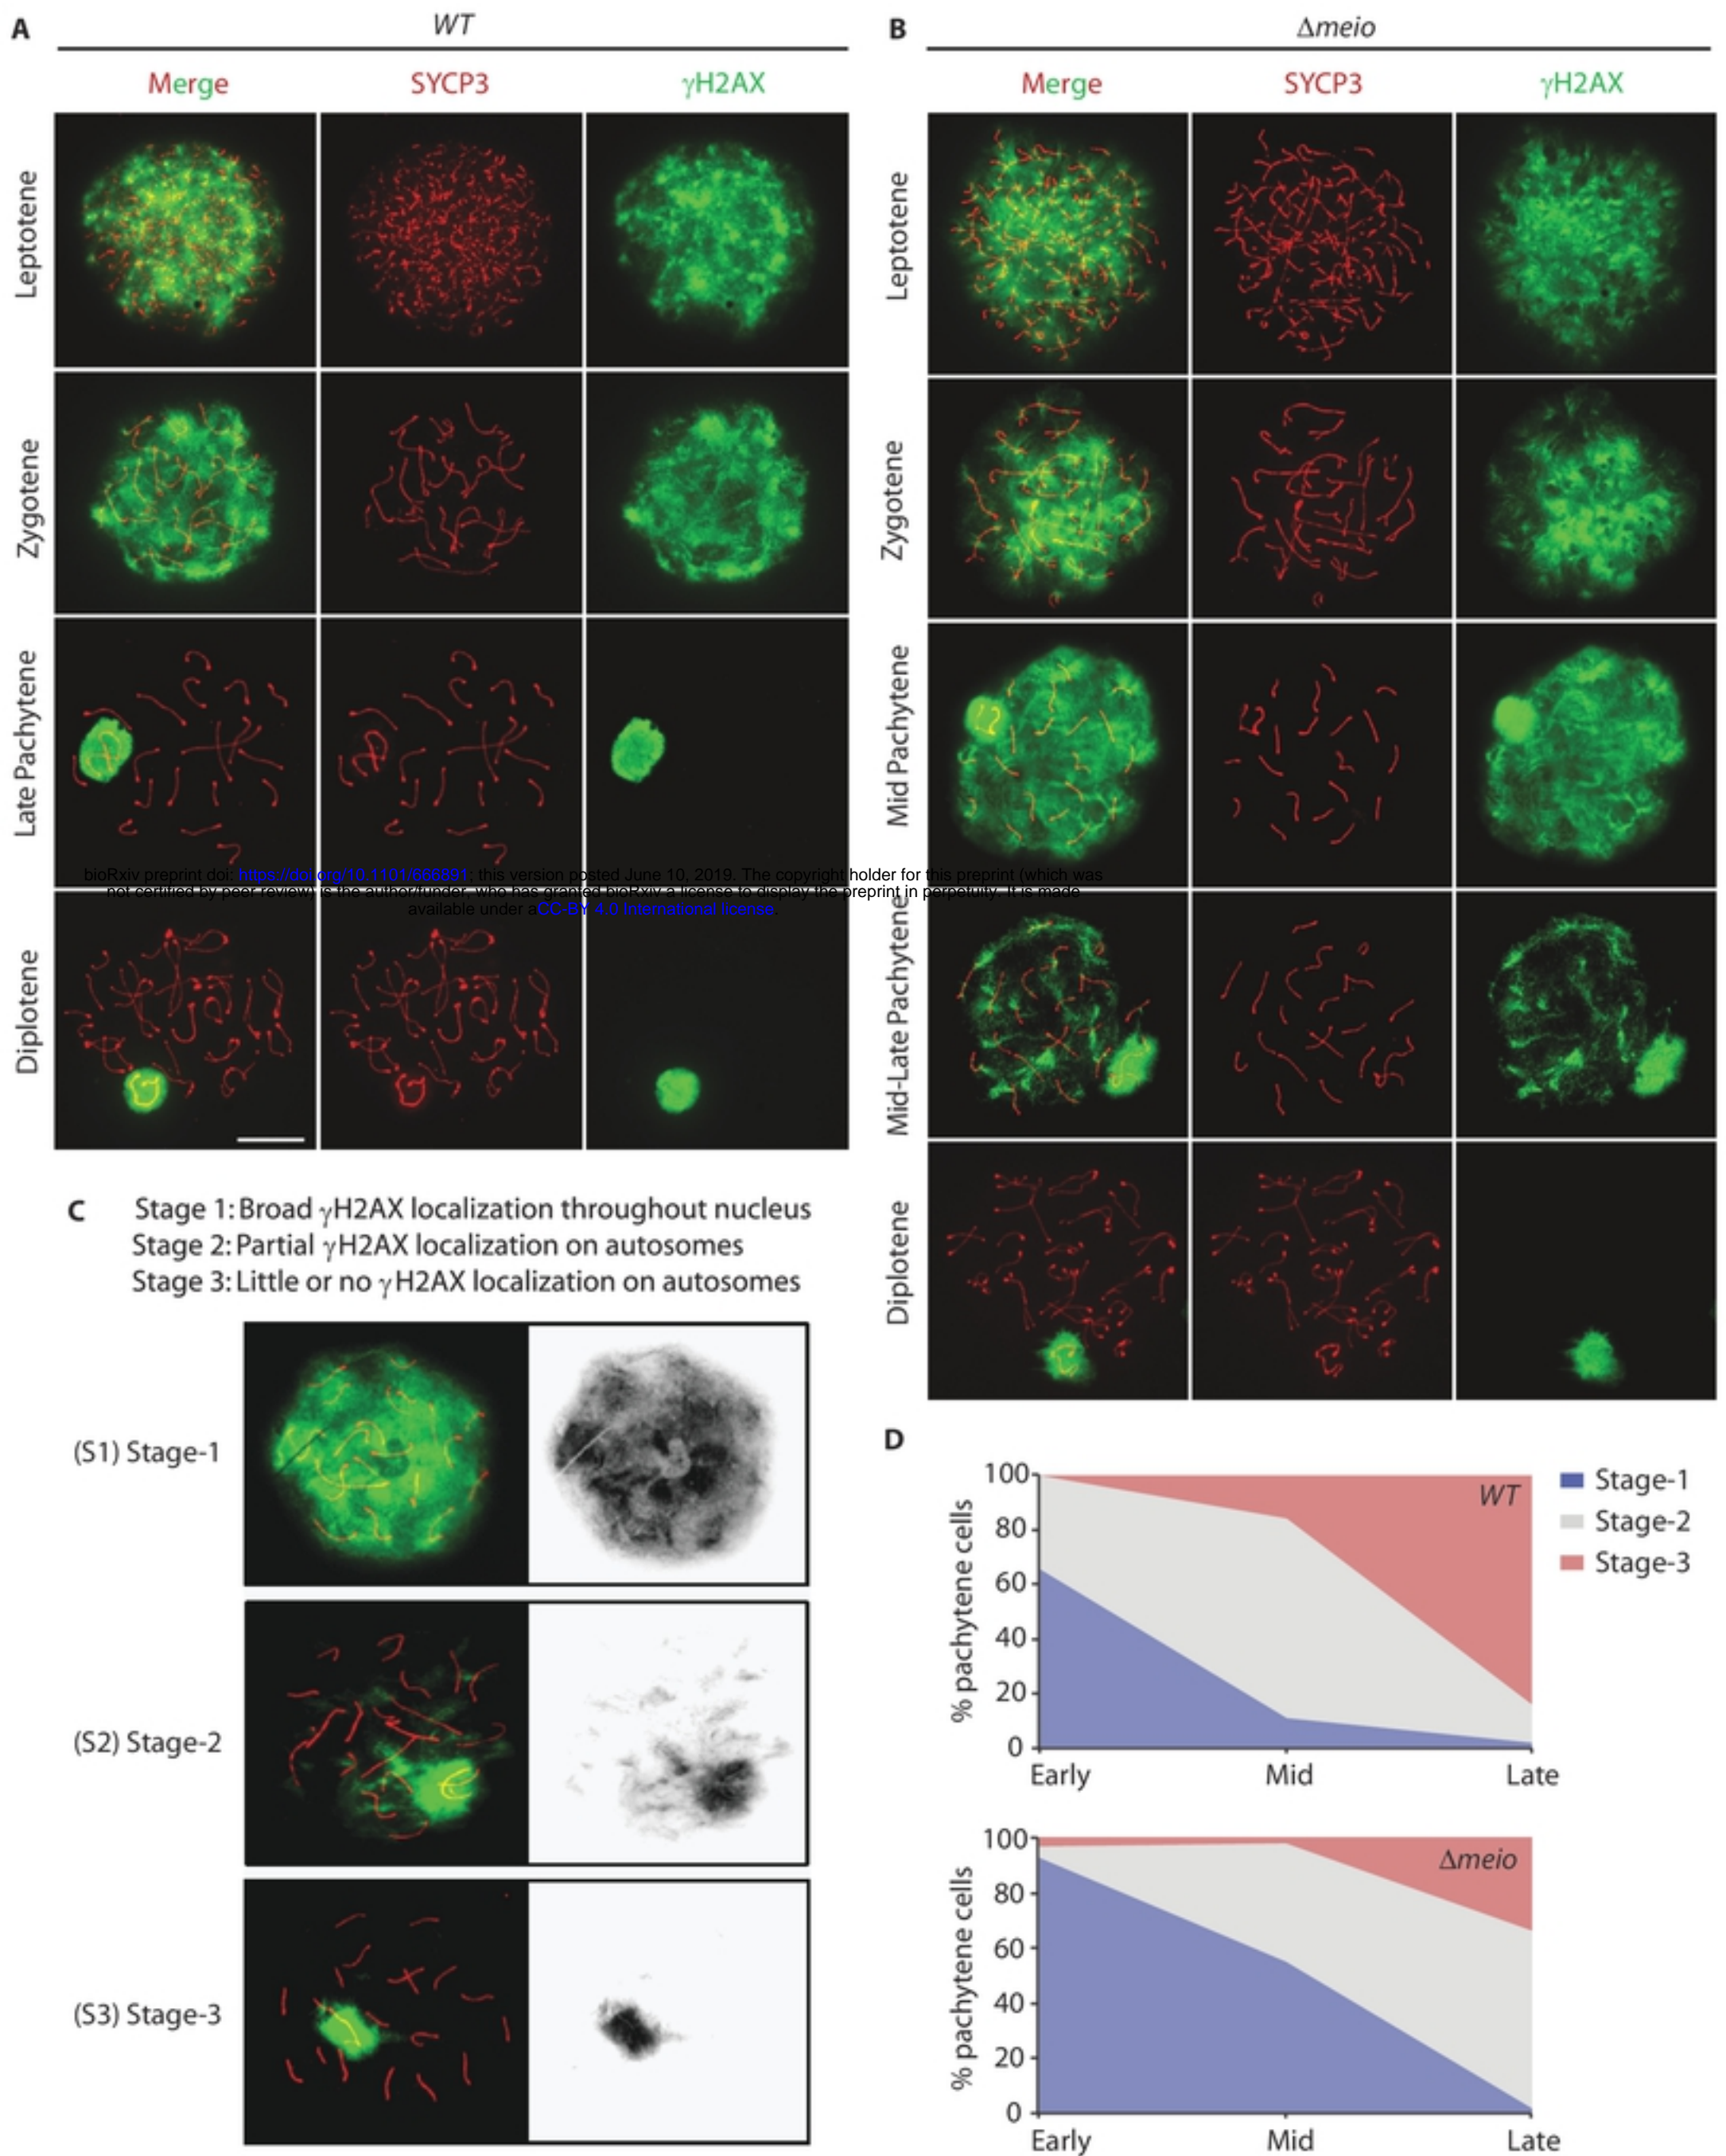

Figure-3

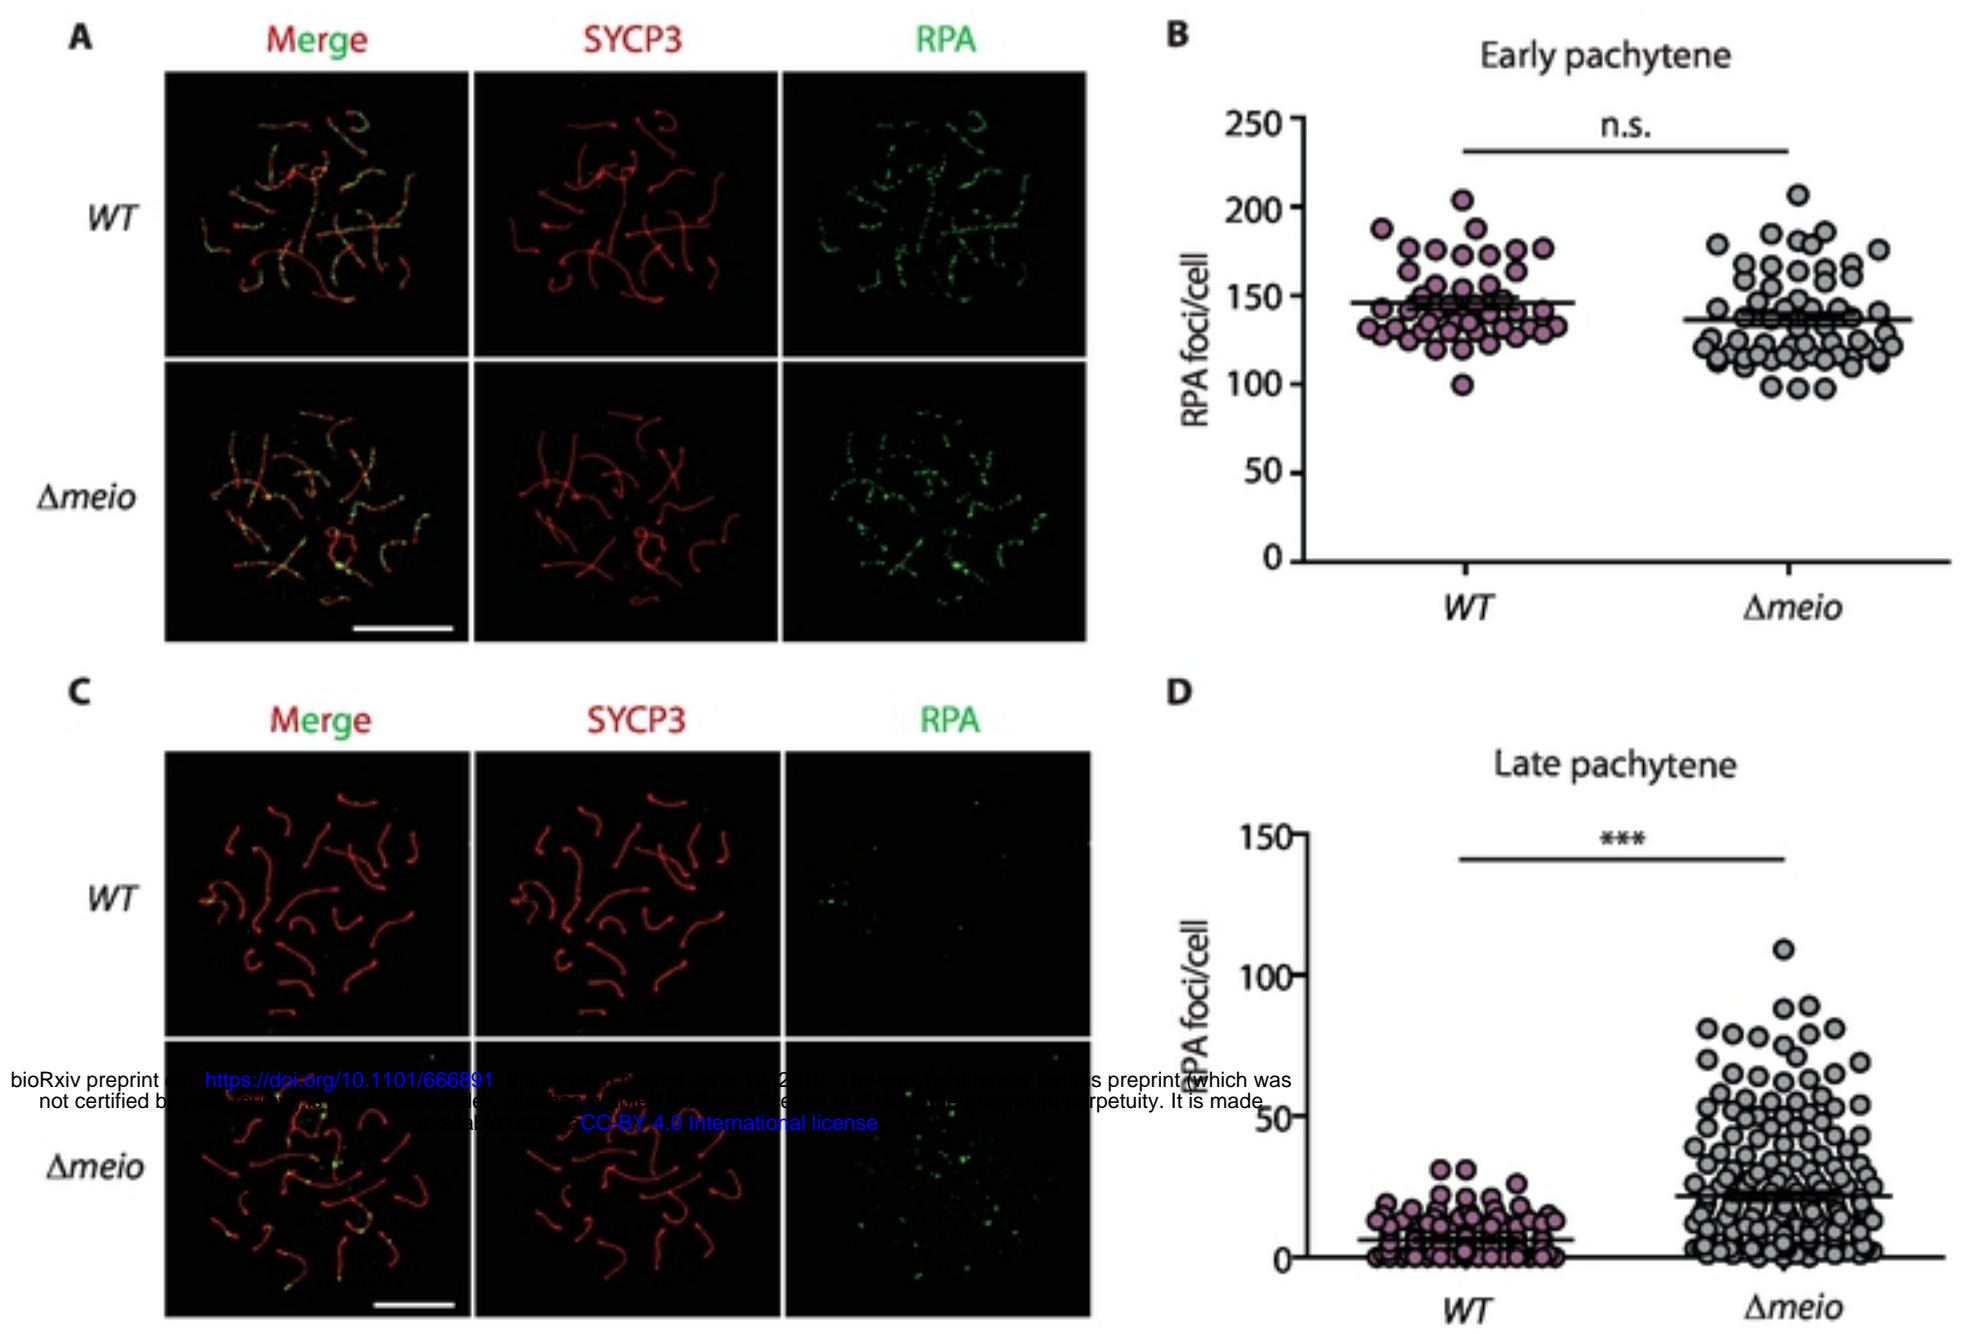

Figure-4

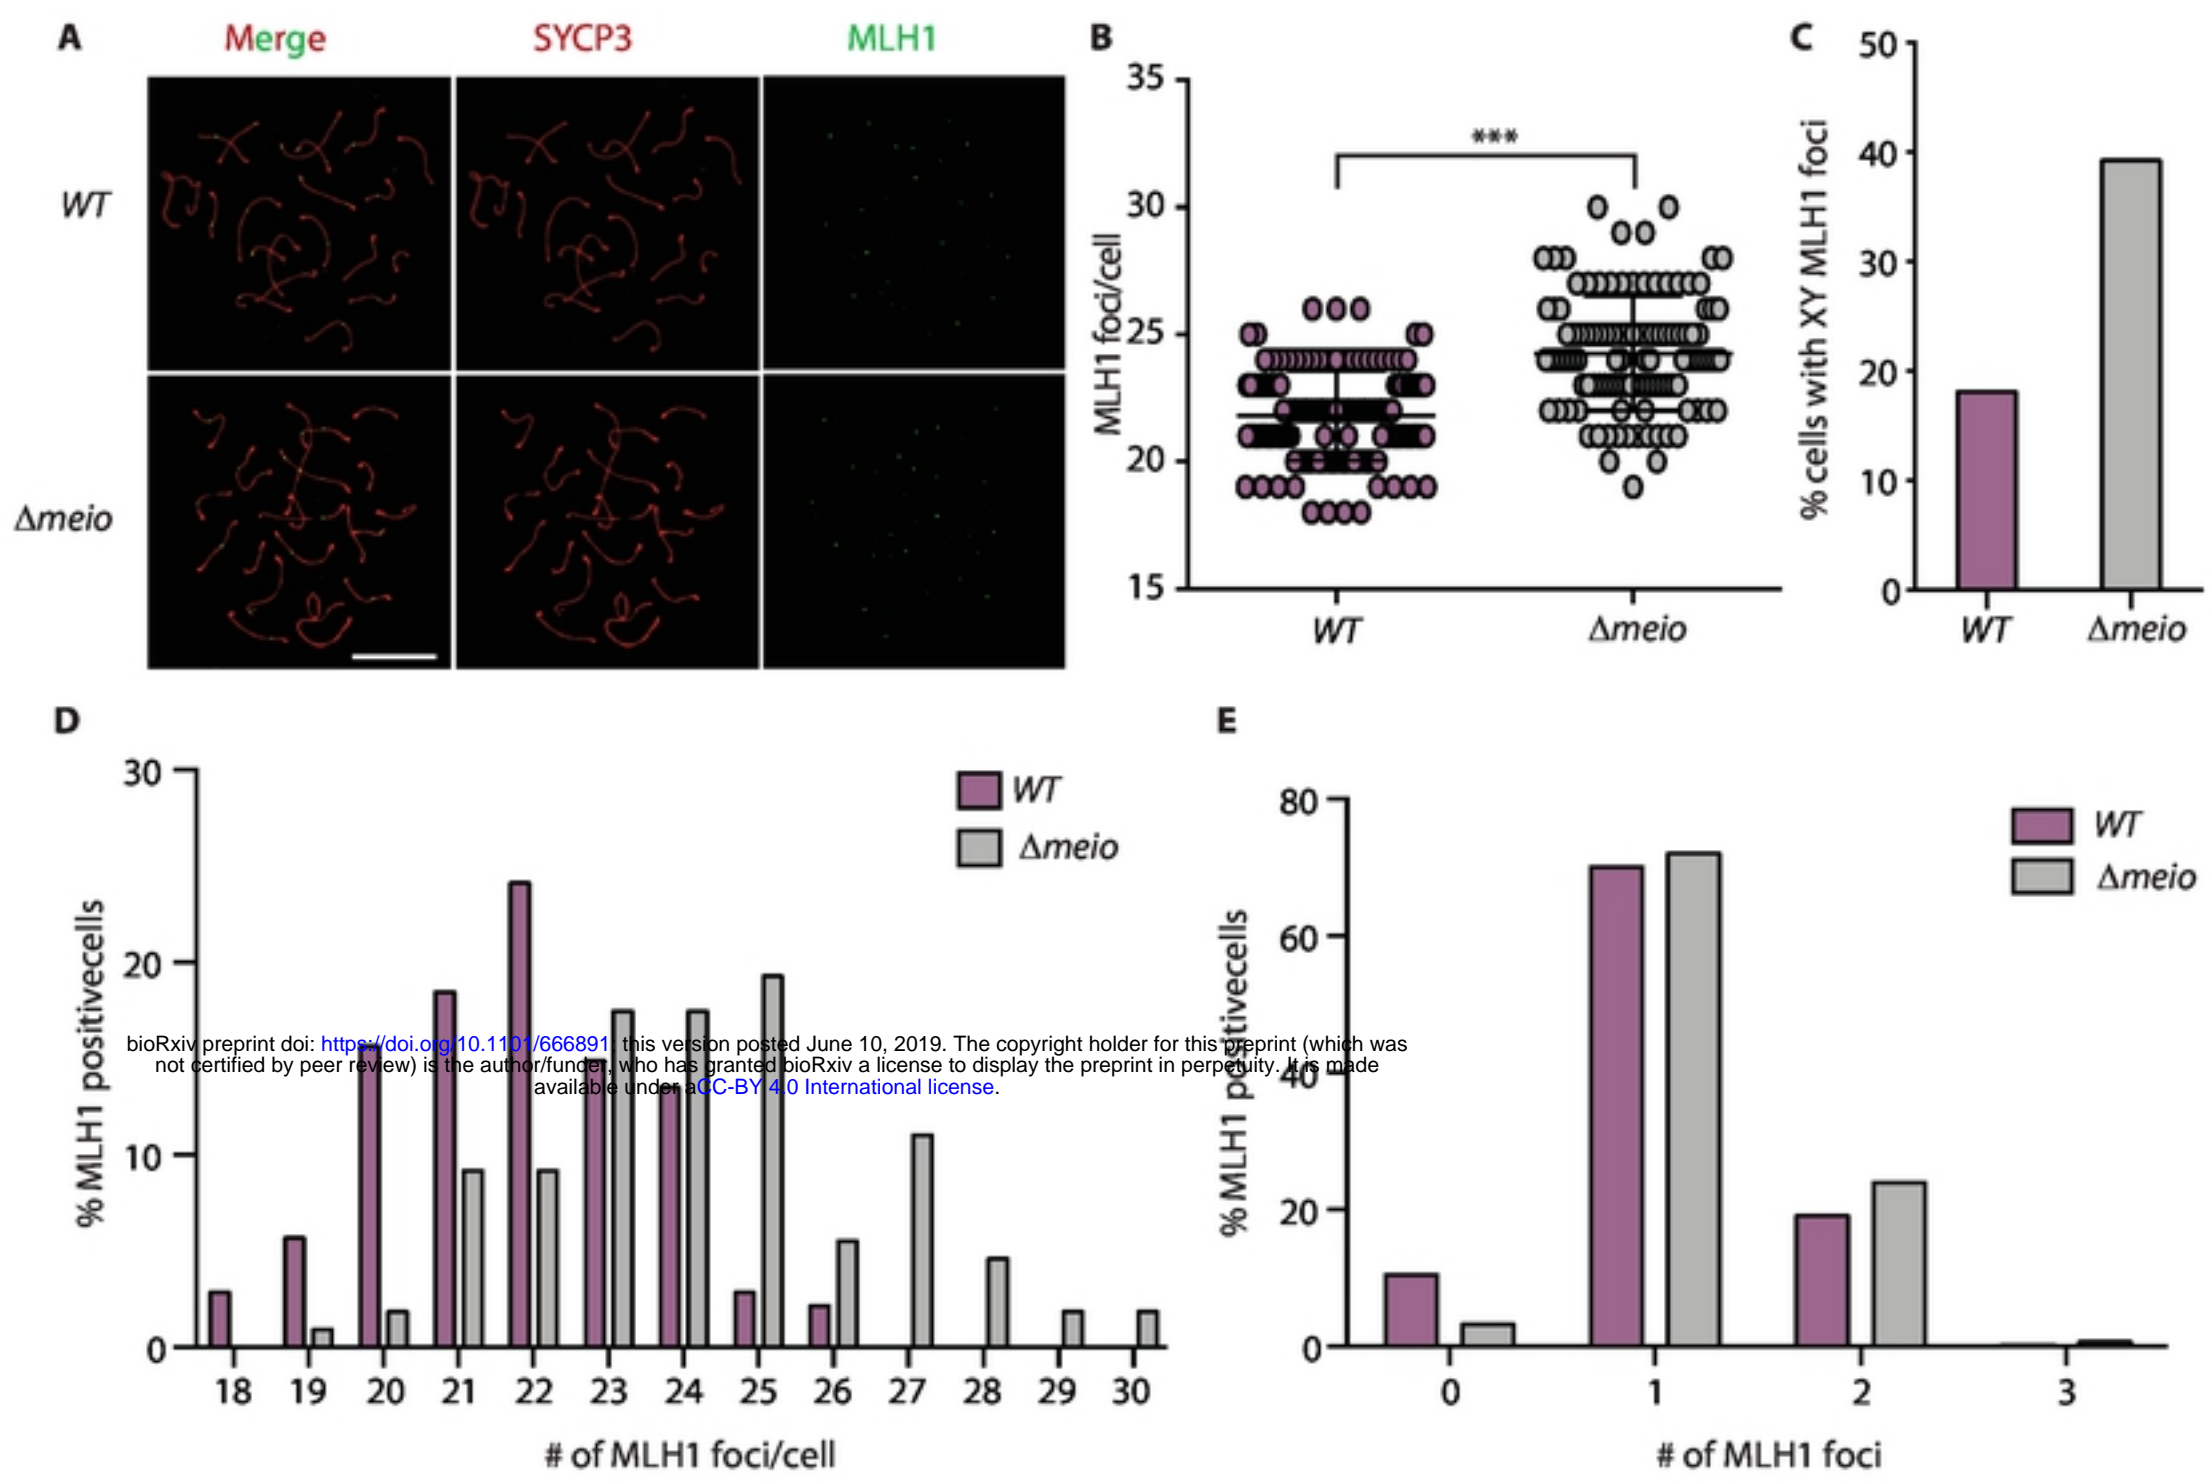

**Figure-5**



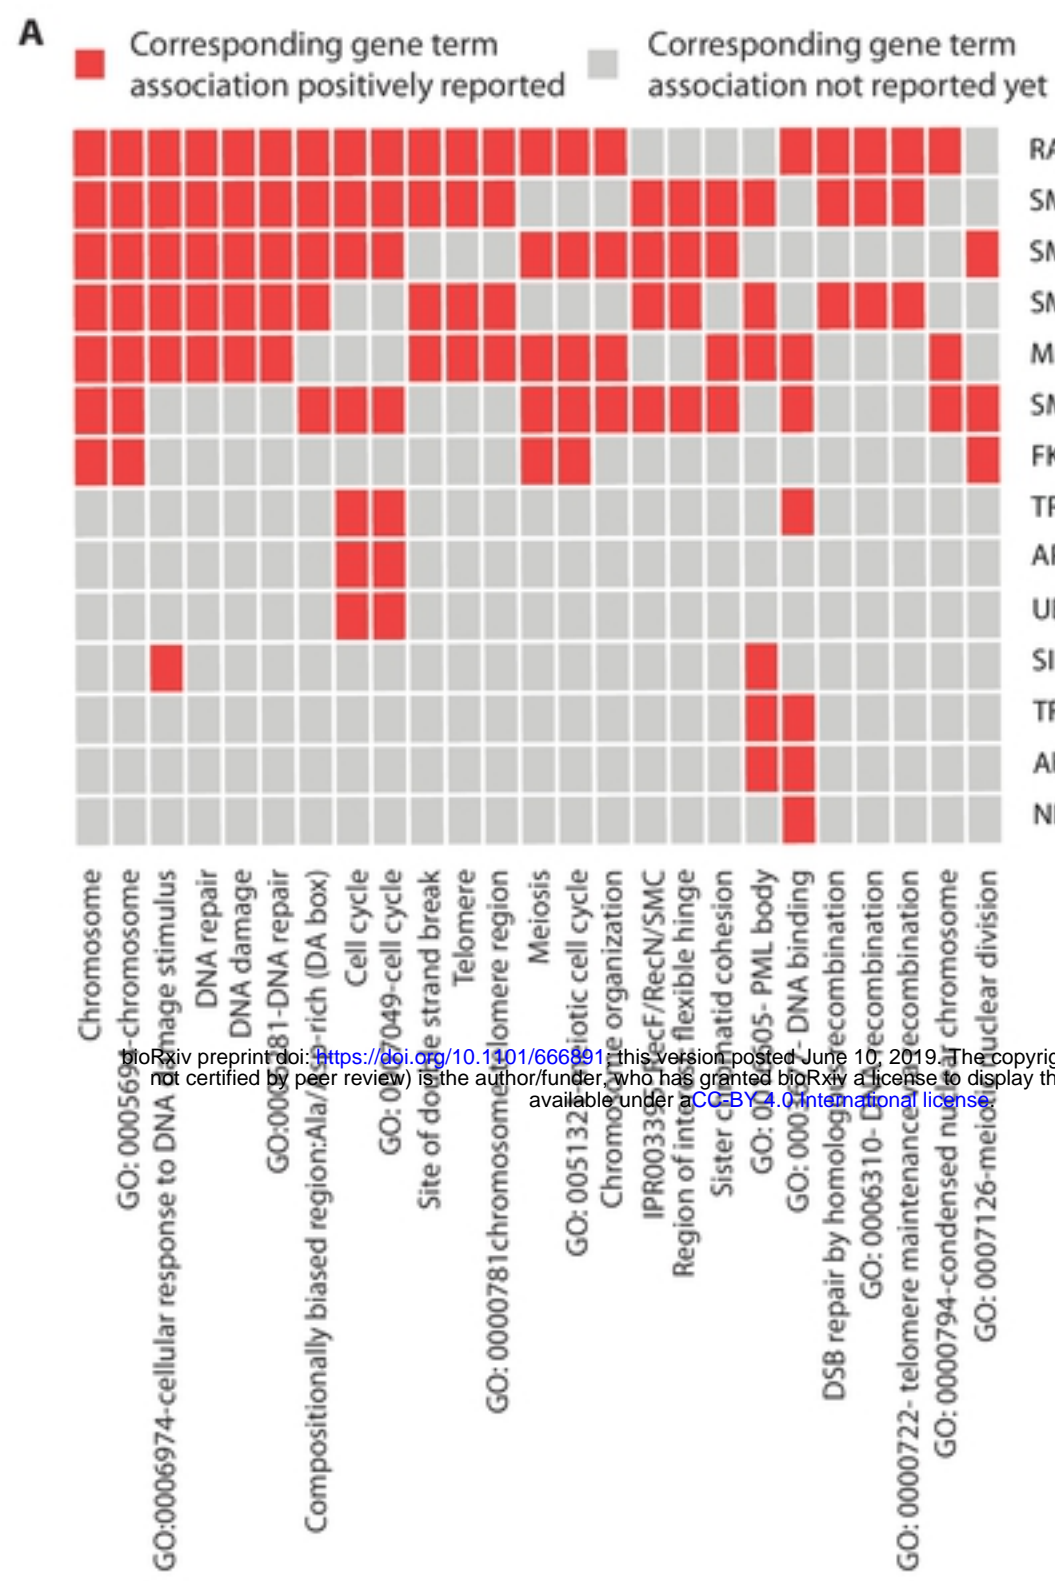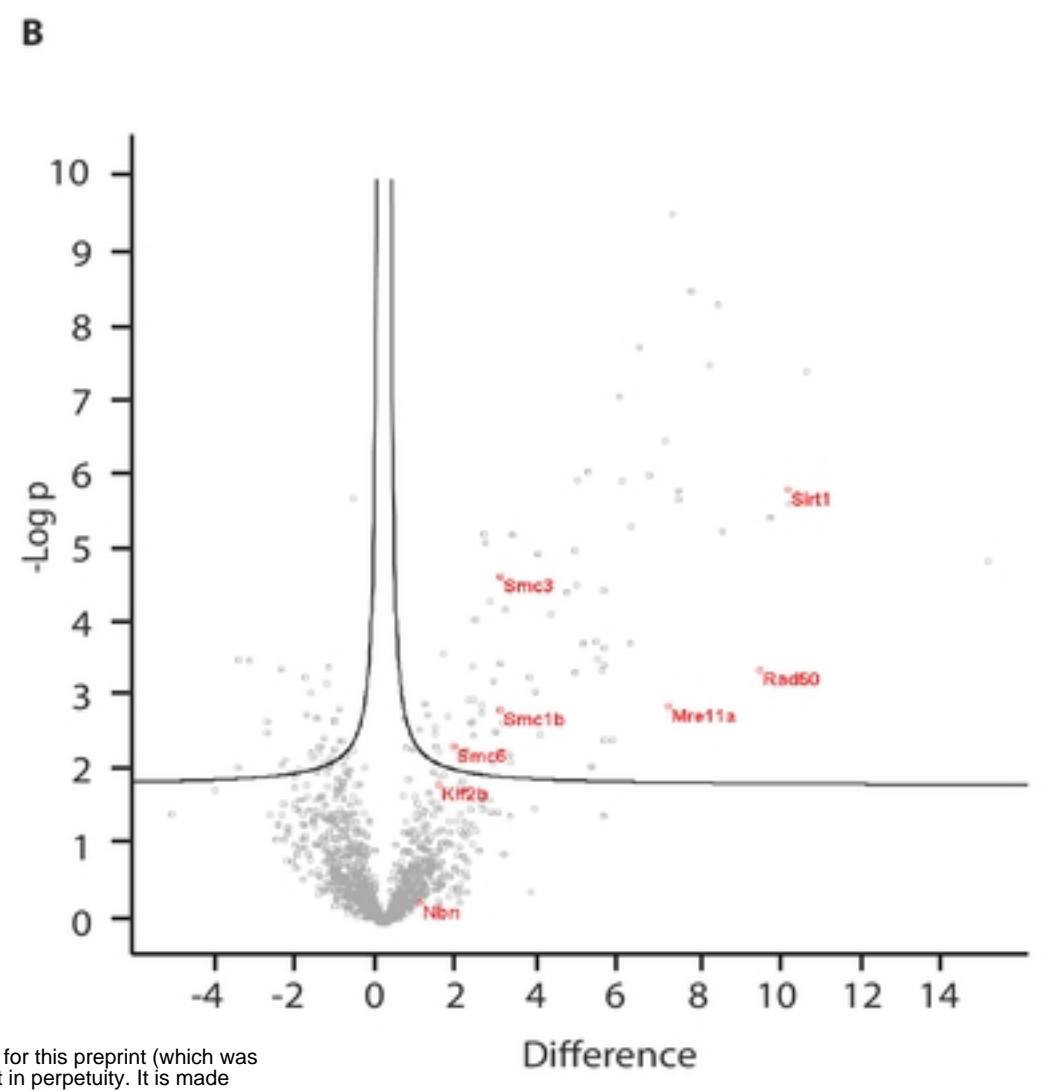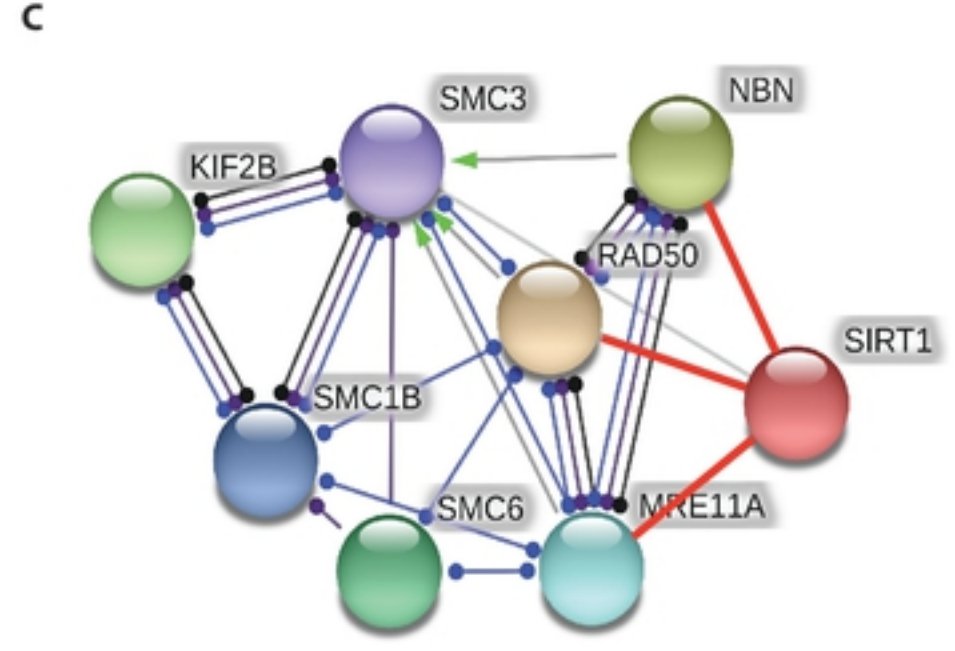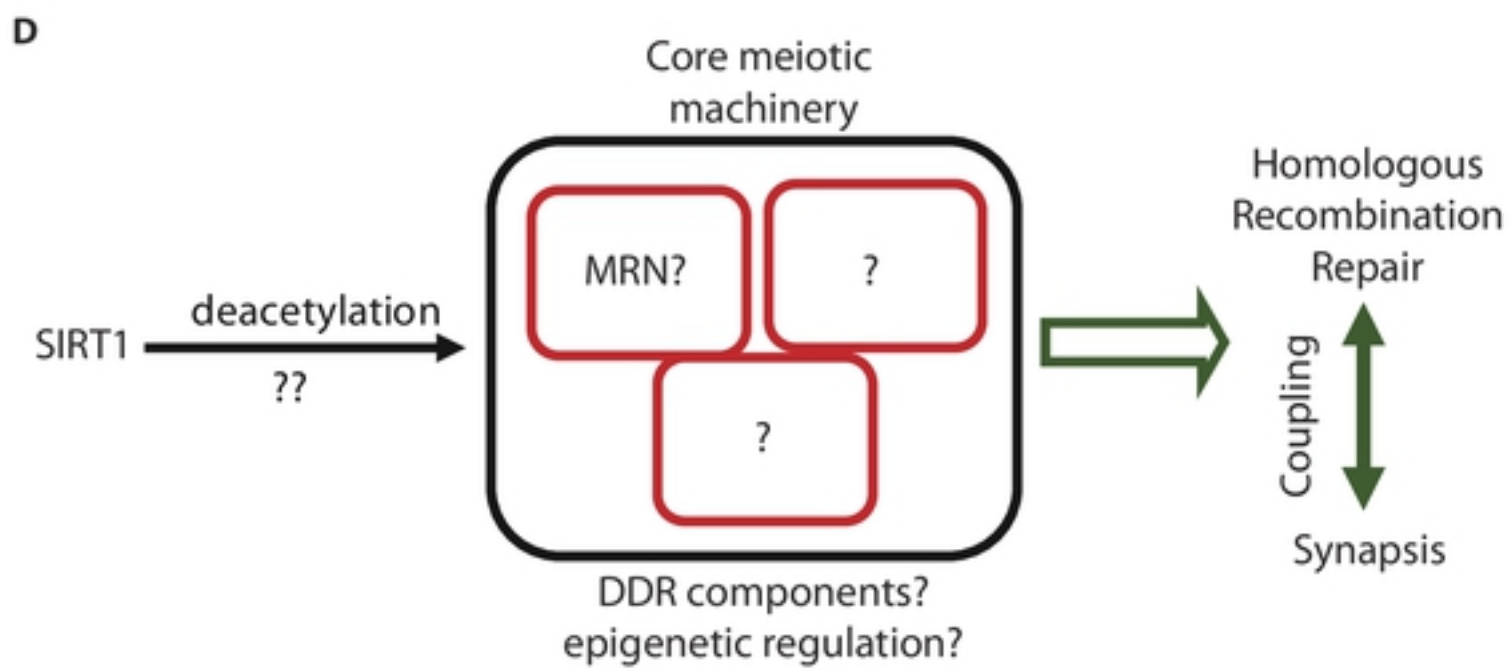

**Figure-6**

**Figure-6**

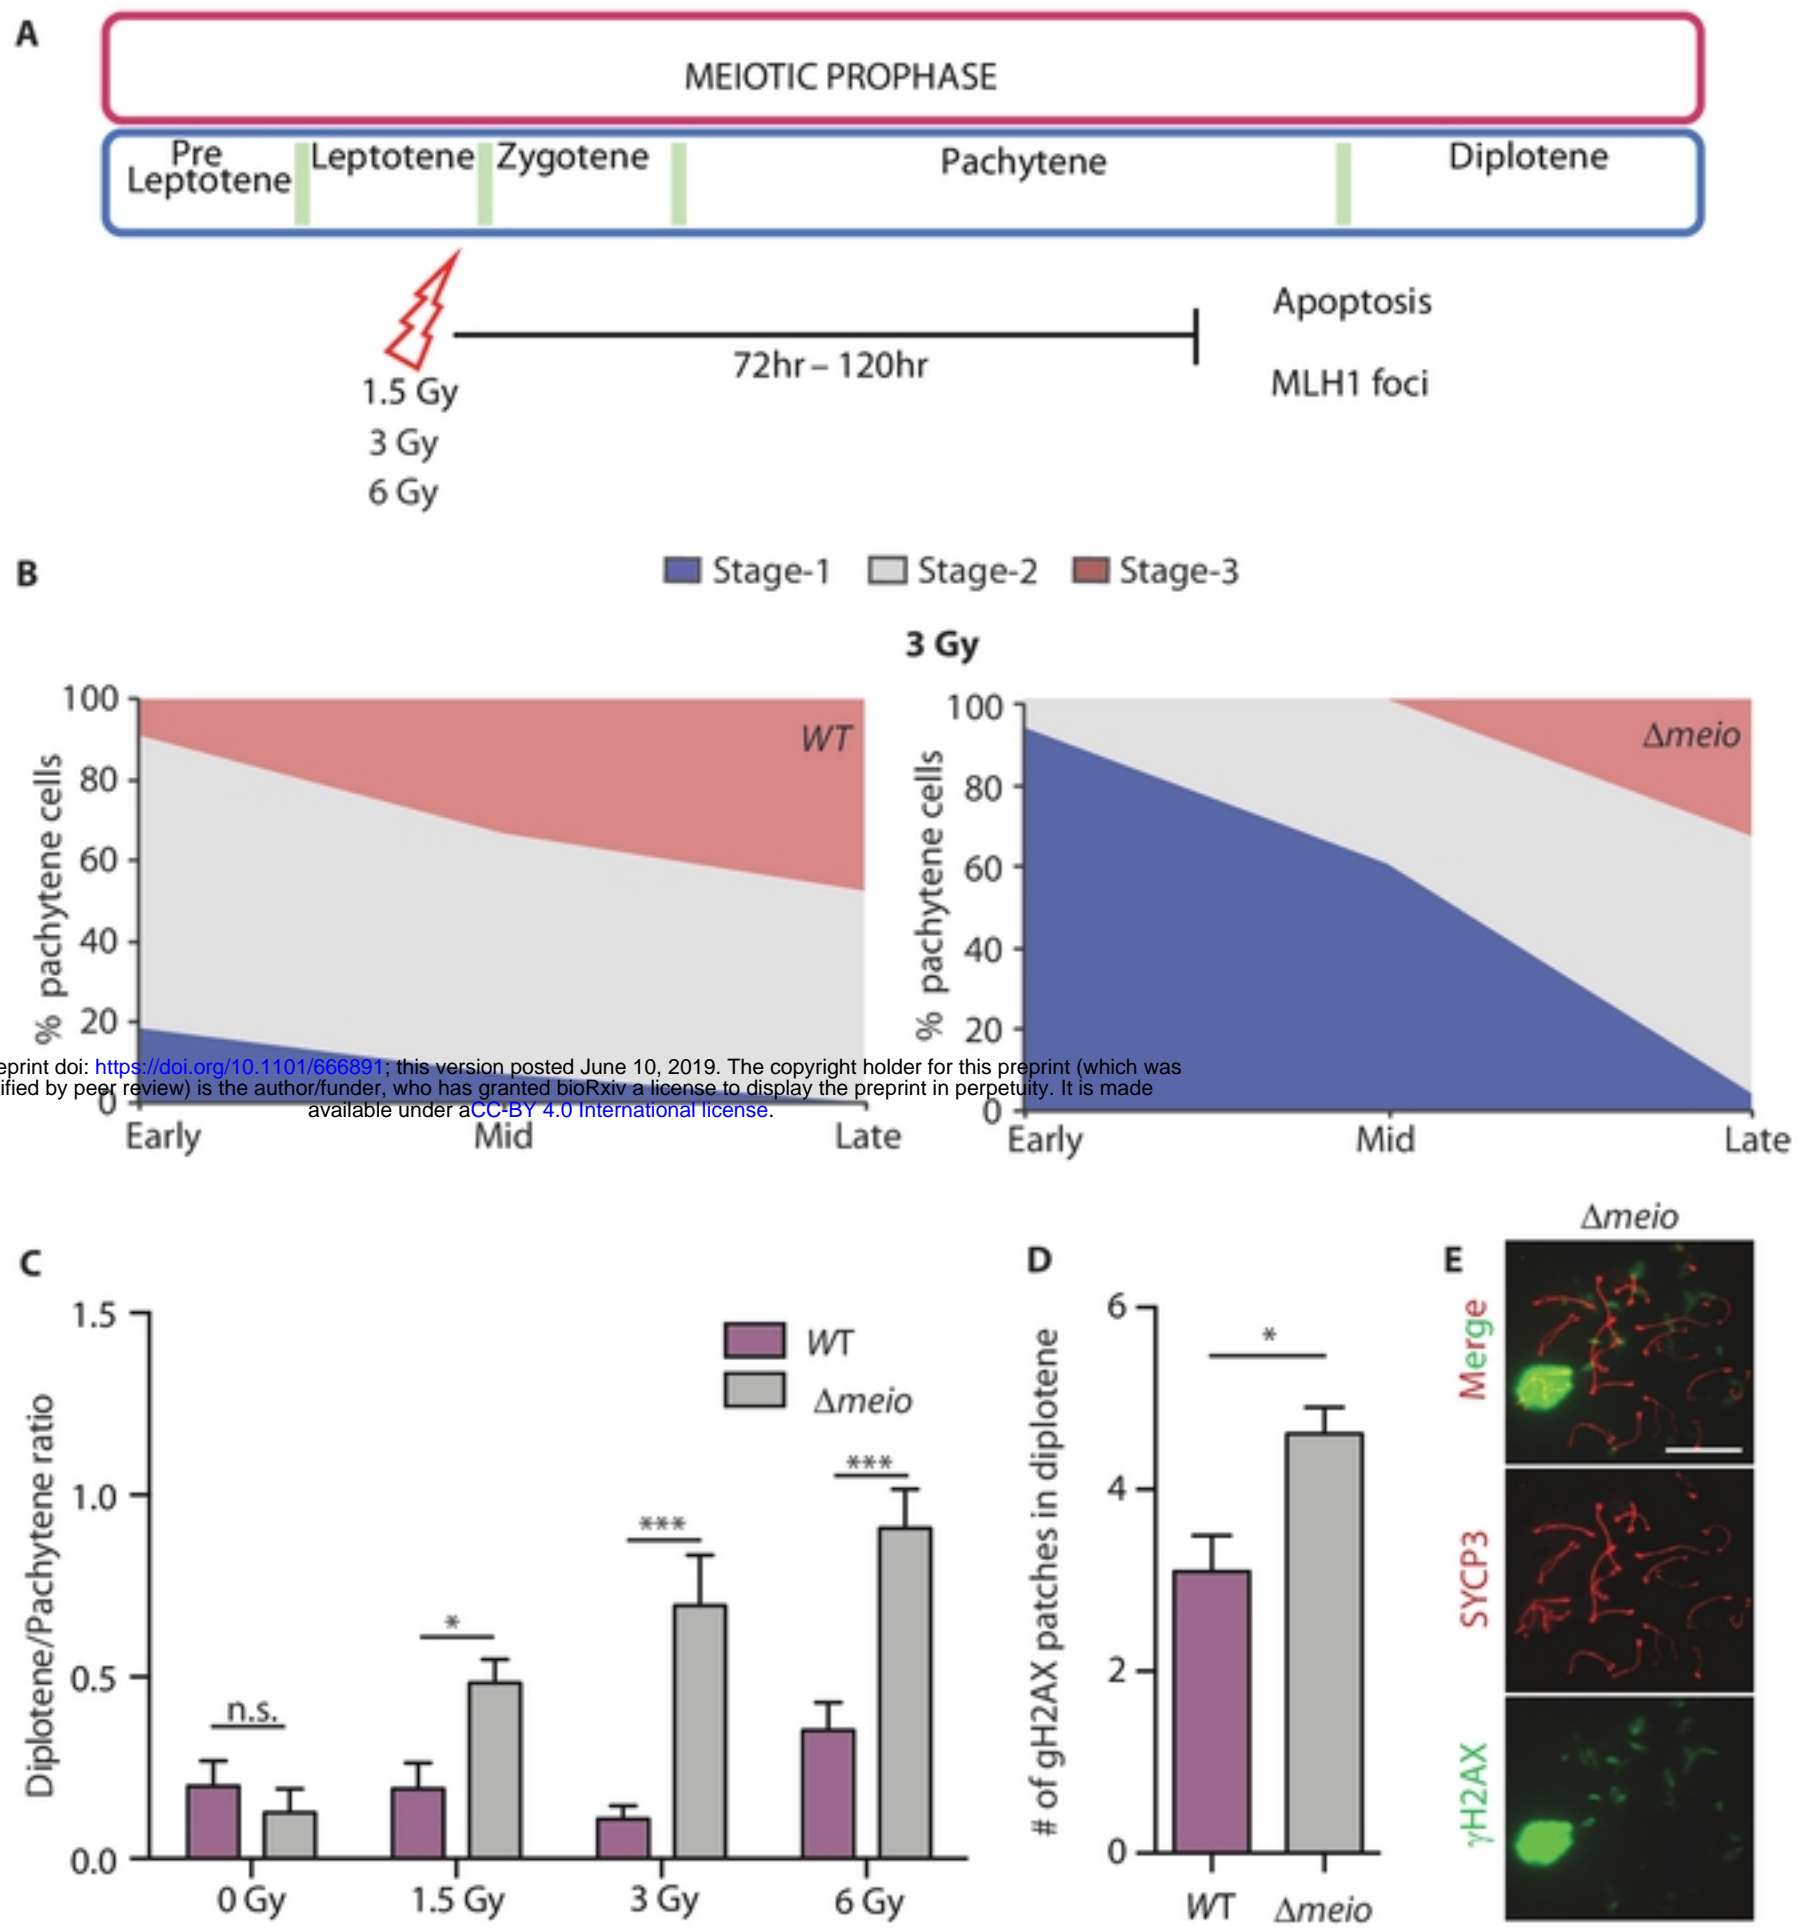

bioRxiv preprint doi: <https://doi.org/10.1101/666891>; this version posted June 10, 2019. The copyright holder for this preprint (which was not certified by peer review) is the author/funder, who has granted bioRxiv a license to display the preprint in perpetuity. It is made available under aCC-BY 4.0 International license.

Figure-7
